# Supplementary material
Source: Research Square preprint supplement (doi:10.21203/rs.3.rs-9274362/v1)
Supplement: Supplementary file 1 [file 0493cc0aea446e0fb1a93c25.xlsx]

## Sheet: Suppl. Table S1
Supplementary Table S1. Baseline demographic and clinical data of the study participants.
N	Age (years)	Sex	Disease Duration (months)	UPDRS-III	H&Y	MoCA-K	NMSS-K	LEDD (mg)
1	56	F	36	40	2.5	23	53	1100
2	75	M	51	52	3	15	48	1000
3	70	M	72	32	2	23	64	900
4	77	F	48	41	2.5	14	105	850
5	69	F	80	35	2	26	25	700
6	70	M	58	13	2	28	47	600
7	63	F	10	47	3	16	151	850
8	63	F	40	24	2	20	72	750
9	77	F	40	35	2.5	25	66	650
10	80	M	33	23	2	25	43	650
11	75	M	61	25	2	17	88	600
12	70	M	37	24	2	15	65	750
13	72	F	63	40	3	26	51	1000
14	68	M	42	53	3	20	155	1200
Values are shown for individual participants at baseline. F, female; M, male; UPDRS-III, Unified Parkinson’s Disease Rating Scale Part III; H&Y, Hoehn and Yahr stage; MoCA-K, Korean version of the Montreal Cognitive Assessment; NMSS-K, Korean version of the Non-Motor Symptoms Scale; LEDD, levodopa equivalent daily dose.

## Sheet: Suppl. Table S2
Supplementary Table S2. Pathway analysis results based on the differential metabolites.
No.	Pathway Name	Total Compound	Hits	Raw p	-log10(p)	Holm p	FDR	Impact
1	Tyrosine Metabolism	55	1	3.85e-08	7.41	1.31e-06	6.55e-07	0
2	Catecholamine Biosynthesis	14	1	3.85e-08	7.41	1.31e-06	6.55e-07	0
3	Glycerolipid Metabolism	23	1	5.32e-07	6.27	1.7e-05	3.62e-06	0
4	Fatty Acid Elongation In Mitochondria	33	1	5.32e-07	6.27	1.7e-05	3.62e-06	0
5	Fatty Acid Biosynthesis	33	1	5.32e-07	6.27	1.7e-05	3.62e-06	0
6	Bile Acid Biosynthesis	59	2	6.92e-07	6.16	2.01e-05	3.92e-06	0
7	Purine Metabolism	63	6	1.04e-06	5.98	2.9e-05	5.04e-06	0.07
8	Plasmalogen Synthesis	16	1	1.44e-06	5.84	3.89e-05	6.13e-06	0
9	Fatty Acid Metabolism	40	2	5.7e-06	5.24	0.000148	2.16e-05	0
10	Phenylalanine and Tyrosine Metabolism	25	2	6.92e-06	5.16	0.000173	2.35e-05	0.22
11	Mitochondrial Beta-Oxidation of Long Chain Saturated Fatty Acids	24	2	1.08e-05	4.97	0.000258	3.33e-05	0
12	Pyrimidine Metabolism	54	1	2.32e-05	4.63	0.000533	6.57e-05	0.02
13	Citric Acid Cycle	26	1	0.00125	2.9	0.0275	0.00283	0.1
14	Transfer of Acetyl Groups into Mitochondria	18	1	0.00125	2.9	0.0275	0.00283	0.07
15	Warburg Effect	49	1	0.00125	2.9	0.0275	0.00283	0.02
16	Tryptophan Metabolism	55	1	0.139	0.856	1	0.289	0
17	Phospholipid Biosynthesis	25	1	0.144	0.84	1	0.289	0.05
18	Pantothenate and CoA Biosynthesis	19	2	0.171	0.768	1	0.323	0.07
19	Methionine Metabolism	39	1	0.232	0.634	1	0.383	0.04
20	Spermidine and Spermine Biosynthesis	14	1	0.232	0.634	1	0.383	0
21	Glutathione Metabolism	19	1	0.237	0.626	1	0.383	0.01
22	Alpha Linolenic Acid and Linoleic Acid Metabolism	16	1	0.259	0.586	1	0.401	0.05
23	Steroidogenesis	42	1	0.386	0.413	1	0.571	0.01
24	Caffeine Metabolism	20	4	0.472	0.326	1	0.669	0.25
25	Beta-Alanine Metabolism	26	1	0.6	0.222	1	0.816	0
26	Arginine and Proline Metabolism	48	1	0.717	0.145	1	0.87	0.12
27	Urea Cycle	23	1	0.717	0.145	1	0.87	0.07
28	Aspartate Metabolism	34	1	0.717	0.145	1	0.87	0
29	Phenylacetate Metabolism	8	1	0.952	0.0212	1	0.966	0
30	Beta Oxidation of Very Long Chain Fatty Acids	13	1	0.954	0.0205	1	0.966	0.05
31	Oxidation of Branched Chain Fatty Acids	22	1	0.954	0.0205	1	0.966	0
32	Carnitine Synthesis	16	1	0.954	0.0205	1	0.966	0
33	Amino Sugar Metabolism	31	1	0.966	0.0149	1	0.966	0.09
Pathway analysis was performed using the metabolites that differed between pre- and post-intervention samples.
Total Compound, number of compounds in the reference pathway; Hits, number of matched compounds from the input dataset; Raw p, unadjusted enrichment p-value; Holm p, Holm-adjusted p-value; FDR, false discovery rate-adjusted p-value; Impact, pathway impact value from pathway topology analysis.

## Sheet: Suppl. Dataset S1
Supplementary Dataset S1. Polar compounds detected and annotated in CSF extracts of patients with Parkinson’s disease by hybrid ion mobility-QTOF MS analysis.
No.	Compound Name	RT [min]	CCS (Å²)	m/z meas.	M meas.	VIP value	Ion mode	FC value (post/pre)	log2(FC)	p-value	-log10(p-value)	PubChem CID	InChIKey	SMILES
1	Indole	4.32	120.9	118.065	117.058	0.6244	Pos	1.0735	0.10234	0.30673	0.51324	798	SIKJAQJRHWYJAI-UHFFFAOYSA-N	C1=CC=C2C(=C1)C=CN2
2	Indoline	3.07	127.6	120.081	119.074	1.4502	Pos	1.0748	0.10402	0.014775	1.8305	10328	LPAGFVYQRIESJQ-UHFFFAOYSA-N	C1CNC2=CC=CC=C21
3	D-Pyroglutamic acid	0.91	128	130.05	129.043	0.66561	Pos	1.1459	0.19645	0.27553	0.55984	439685	ODHCTXKNWHHXJC-GSVOUGTGSA-N	C1CC(=O)N[C@H]1C(=O)O
4	Threonic acid	0.86	117.8	135.03	136.037	0.4602	Neg	1.038	0.05374	0.37284	0.42848	5460407	JPIJQSOTBSSVTP-STHAYSLISA-N	C([C@@H]([C@H](C(=O)O)O)O)O
5	1-Isopropyl-3-methylbenzene	5.12	127.2	135.117	134.11	0.14345	Pos	0.91019	-0.13576	0.81534	0.088662	10812	XCYJPXQACVEIOS-UHFFFAOYSA-N	CC1=CC(=CC=C1)C(C)C
6	Adenine	1.11	125.1	136.062	135.055	0.9329	Pos	1.0886	0.12254	0.12401	0.90655	190	GFFGJBXGBJISGV-UHFFFAOYSA-N	C1=NC2=C(N1)C(=NC=N2)N
7	Hypoxanthine	1.77	127.5	137.046	136.039	2.1722	Pos	1.2498	0.32166	0.00013172	3.8804	135398638	FDGQSTZJBFJUBT-UHFFFAOYSA-N	C1=NC2=C(N1)C(=O)NC=N2
8	4-Anisaldehyde	5.33	120.1	137.06	136.053	0.58117	Pos	1.1954	0.25743	0.34181	0.46622	31244	ZRSNZINYAWTAHE-UHFFFAOYSA-N	COC1=CC=C(C=C1)C=O
9	6-Methylquinoline	4.32	126.4	144.081	143.074	0.13507	Pos	1.015	0.02149	0.82595	0.083046	7059	LUYISICIYVKBTA-UHFFFAOYSA-N	CC1=CC2=C(C=C1)N=CC=C2
10	OXYQUINOLINE	5.36	126.9	146.06	145.053	0.15188	Pos	0.91778	-0.12379	0.8047	0.094366	1923	MCJGNVYPOGVAJF-UHFFFAOYSA-N	C1=CC2=C(C(=C1)O)N=CC=C2
11	4-formyl Indole	4.32	130	146.06	145.053	0.36758	Pos	1.0408	0.057631	0.54888	0.26052	333703	JFDDFGLNZWNJTK-UHFFFAOYSA-N	C1=CC(=C2C=CNC2=C1)C=O
12	Coumarin	1.96	124	147.044	146.037	0.03126	Pos	1.0036	0.0051836	0.95942	0.01799	323	ZYGHJZDHTFUPRJ-UHFFFAOYSA-N	C1=CC=C2C(=C1)C=CC(=O)O2
13	Phthalic anhydride	11.17	124.3	149.023	148.016	0.19001	Pos	0.9588	-0.060701	0.75701	0.1209	6811	LGRFSURHDFAFJT-UHFFFAOYSA-N	C1=CC=C2C(=C1)C(=O)OC2=O
14	Trans-Cinnamic acid	2.63	124.4	149.06	148.053	1.5284	Pos	1.3831	0.46794	0.0099034	2.0042	444539	WBYWAXJHAXSJNI-VOTSOKGWSA-N	C1=CC=C(C=C1)/C=C/C(=O)O
15	Xanthine	1.93	119.6	151.026	152.033	2.4728	Neg	1.7551	0.81153	1.9783e-08	7.7037	1188	LRFVTYWOQMYALW-UHFFFAOYSA-N	C1=NC2=C(N1)C(=O)NC(=O)N2
16	Amantadine	5.12	140.2	152.144	151.136	0.0764	Pos	0.95913	-0.060203	0.90103	0.045259	2130	DKNWSYNQZKUICI-UHFFFAOYSA-N	C1C2CC3CC1CC(C2)(C3)N
17	Vanillin	2.64	130.2	153.055	152.047	1.3642	Pos	1.3231	0.40388	0.022347	1.6508	1183	MWOOGOJBHIARFG-UHFFFAOYSA-N	COC1=C(C=CC(=C1)C=O)O
18	Nudifloramide	2.48	131.8	153.066	152.059	1.1034	Pos	1.5894	0.66844	0.067405	1.1713	69698	JLQSXXWTCJPCBC-UHFFFAOYSA-N	CN1C=C(C=CC1=O)C(=O)N
19	3-Aminosalicylic acid	2.41	125.7	154.05	153.043	1.1346	Pos	1.4519	0.53796	0.059742	1.2237	68443	IQGMRVWUTCYCST-UHFFFAOYSA-N	C1=CC(=C(C(=C1)N)O)C(=O)O
20	N-Acetyl-L-Prolinamide	1.35	132	157.098	156.09	0.3186	Pos	1.0471	0.066375	0.60354	0.21929	85395	CXURPNUIYCJENH-LURJTMIESA-N	CC(=O)N1CCC[C@H]1C(=O)N
21	1-(p-Tolyl)cyclopropanecarbonitrile	13.37	129.5	158.097	157.089	1.1638	Pos	0.66221	-0.59464	0.053211	1.274	98628	NMDIWHQRZLXXNV-UHFFFAOYSA-N	CC1=CC=C(C=C1)C2(CC2)C#N
22	6-Methylquinolin-8-amine	4.32	133.6	159.092	158.085	0.53507	Pos	1.0557	0.078161	0.38183	0.41813	110237	ZAKYERLVLCYWJN-UHFFFAOYSA-N	CC1=CC2=C(C(=C1)N)N=CC=C2
23	3-(3-Toluidino)propanenitrile	4.43	134.6	161.107	160.1	1.0978	Pos	1.1362	0.18417	0.068846	1.1621	1809626	MKXMURBQSSTNIT-UHFFFAOYSA-N	CC1=CC=C(C=C1)NCCC#N
24	L-Carnitine	0.86	133.3	162.113	161.105	0.26428	Pos	1.032	0.045482	0.66678	0.17602	10917	PHIQHXFUZVPYII-ZCFIWIBFSA-N	C[N+](C)(C)C[C@@H](CC(=O)[O-])O
25	L-Phenylalanine	3.07	138.6	164.072	165.079	1.1642	Neg	1.1253	0.17026	0.020834	1.6812	6140	COLNVLDHVKWLRT-QMMMGPOBSA-N	C1=CC=C(C=C1)C[C@@H](C(=O)O)N
26	D-Arabinonic acid	0.86	125	165.041	166.048	0.06023	Neg	1.0116	0.016646	0.90755	0.042131	122045	QXKAIJAYHKCRRA-JJYYJPOSSA-N	C([C@H]([C@H]([C@@H](C(=O)O)O)O)O)O
27	7-Methylguanine	1.81	131.8	166.072	165.065	2.2495	Pos	1.3502	0.43316	6.7319e-05	4.1719	135398679	FZWGECJQACGGTI-UHFFFAOYSA-N	CN1C=NC2=C1C(=O)N=C(N2)N
28	[4-(Methylamino)phenyl]acetic acid	2.64	141.7	166.086	165.079	1.375	Pos	1.2914	0.36895	0.021242	1.6728	290114	NJEQMJPXRHIYMD-UHFFFAOYSA-N	CNC1=CC=C(C=C1)CC(=O)O
29	Uric acid	1.68	124.5	167.021	168.028	0.017791	Neg	0.99696	-0.0043974	0.97264	0.012049	1175	LEHOTFFKMJEONL-UHFFFAOYSA-N	C12=C(NC(=O)N1)NC(=O)NC2=O
30	Diphenylamine	0.28	138.2	170.096	169.089	1.2229	Pos	0.83367	-0.26245	0.041764	1.3792	11487	DMBHHRLKUKUOEG-UHFFFAOYSA-N	C1=CC=C(C=C1)NC2=CC=CC=C2
31	3-Cyclohexyl-1,1-dimethylurea	2.33	140.9	171.149	170.142	1.3738	Pos	2.0087	1.0062	0.021369	1.6702	4594662	PZWXYRDNQYUIIU-UHFFFAOYSA-N	CN(C)C(=O)NC1CCCCC1
32	N-Acetyl-D-norleucine	5.58	139.8	172.098	173.105	0.29631	Neg	0.96266	-0.054907	0.56711	0.24633	6995106	JDMCEGLQFSOMQH-SSDOTTSWSA-N	CCCC[C@H](C(=O)O)NC(=O)C
33	Suberic acid	5.75	135.1	173.082	174.089	0.24853	Neg	1.0699	0.097452	0.63139	0.1997	10457	TYFQFVWCELRYAO-UHFFFAOYSA-N	C(CCCC(=O)O)CCC(=O)O
34	L-Arginine	0.85	137.5	175.118	174.111	0.22676	Pos	0.88119	-0.18248	0.71187	0.1476	6322	ODKSFYDXXFIFQN-BYPYZUCNSA-N	C(C[C@@H](C(=O)O)N)CN=C(N)N
35	Cotinine	2.02	144.9	177.102	176.094	0.17219	Pos	0.78506	-0.34912	0.77919	0.10835	854019	UIKROCXWUNQSPJ-VIFPVBQESA-N	CN1[C@@H](CCC1=O)C2=CN=CC=C2
36	Theophylline	4.31	131.4	179.057	180.065	0.3234	Neg	0.80361	-0.31544	0.53206	0.27404	2153	ZFXYFBGIUFBOJW-UHFFFAOYSA-N	CN1C2=C(C(=O)N(C1=O)C)NC=N2
37	L-Tyrosine	2.06	143.2	180.067	181.074	2.3907	Neg	1.4599	0.54591	8.7134e-08	7.0598	6057	OUYCCCASQSFEME-QMMMGPOBSA-N	C1=CC(=CC=C1C[C@@H](C(=O)O)N)O
38	p-Hydroxyphenyllactic acid	4.41	140.9	181.051	182.058	1.6031	Neg	1.4294	0.51544	0.0010568	2.976	9855652	HXIPUYVSSGKLFF-VIFPVBQESA-N	C[C@](C1=CC=C(C=C1)O)(C(=O)O)O
39	Theobromine	3.66	137.2	181.072	180.065	0.051171	Pos	1.0229	0.032641	0.93362	0.029829	5429	YAPQBXQYLJRXSA-UHFFFAOYSA-N	CN1C=NC2=C1C(=O)NC(=O)N2C
40	1,7-Dimethylxanthine	4.27	134.5	181.072	180.065	0.14711	Pos	1.0682	0.095207	0.81071	0.091132	4687	QUNWUDVFRNGTCO-UHFFFAOYSA-N	CN1C=NC2=C1C(=O)N(C(=O)N2)C
41	Isopropyl 4-hydroxybenzoate	8.28	137.2	181.086	180.078	0.10982	Pos	0.9606	-0.057999	0.85811	0.066456	20161	CMHMMKSPYOOVGI-UHFFFAOYSA-N	CC(C)OC(=O)C1=CC=C(C=C1)O
42	D-TYROSINE	1.98	146.5	182.081	181.073	0.92287	Pos	1.0983	0.13525	0.12821	0.89208	71098	OUYCCCASQSFEME-MRVPVSSYSA-N	C1=CC(=CC=C1C[C@H](C(=O)O)N)O
43	Tributylamine	6.77	150	186.221	185.214	1.8839	Pos	1.5974	0.67576	0.0011723	2.931	7622	IMFACGCPASFAPR-UHFFFAOYSA-N	CCCCN(CCCC)CCCC
44	Nalpha-Acetyl-L-glutamine	1.05	138.6	187.072	188.08	0.72857	Neg	1.0744	0.10347	0.15551	0.80823	182230	KSMRODHGGIIXDV-YFKPBYRVSA-N	CC(=O)N[C@@H](CCC(=O)N)C(=O)O
45	Azelaic acid	6.37	139.3	187.098	188.105	0.091111	Neg	1.0241	0.034319	0.86053	0.065232	2266	BDJRBEYXGGNYIS-UHFFFAOYSA-N	C(CCCC(=O)O)CCCC(=O)O
46	3-Indoleacrylic acid	4.32	140.5	188.07	187.063	0.40754	Pos	1.0384	0.054419	0.50611	0.29576	5375048	PLVPPLCLBIEYEA-AATRIKPKSA-N	C1=CC=C2C(=C1)C(=CN2)/C=C/C(=O)O
47	L-NIL	0.95	141.8	188.139	187.132	1.3595	Pos	1.4538	0.53978	0.022847	1.6412	2733506	ONYFNWIHJBLQKE-ZETCQYMHSA-N	CC(=NCCCC[C@@H](C(=O)O)N)N
48	N.alpha.-Acetyl-L-lysine	1.69	140.8	189.122	188.115	0.69827	Pos	1.0962	0.13252	0.25234	0.59801	92907	VEYYWZRYIYDQJM-ZETCQYMHSA-N	CC(=O)N[C@@H](CCCCN)C(=O)O
49	2.4-Dichlorobenzoic acid	8.32	133.1	190.965	189.958	1.0677	Pos	1.1877	0.24811	0.077108	1.1129	5787	ATCRIUVQKHMXSH-UHFFFAOYSA-N	C1=CC(=C(C=C1Cl)Cl)C(=O)O
50	Isocitric acid	1	126.6	191.02	192.027	0.8005	Neg	0.87331	-0.19543	0.11777	0.92898	1198	ODBLHEXUDAPZAU-UHFFFAOYSA-N	C(C(C(C(=O)O)O)C(=O)O)C(=O)O
51	Citric acid	1.38	126.8	191.02	192.027	1.5213	Neg	0.59192	-0.75654	0.0020126	2.6962	311	KRKNYBCHXYNGOX-UHFFFAOYSA-N	C(C(=O)O)C(CC(=O)O)(C(=O)O)O
52	Quinic acid	0.92	134.4	191.056	192.064	0.27187	Neg	1.1399	0.18886	0.5996	0.22214	6508	AAWZDTNXLSGCEK-LNVDRNJUSA-N	C1[C@H](C([C@@H](CC1(C(=O)O)O)O)O)O
53	Galactonic acid	0.87	132.4	195.051	196.059	0.40633	Neg	1.0708	0.098671	0.43182	0.36469	128869	RGHNJXZEOKUKBD-MGCNEYSASA-N	C([C@H]([C@@H]([C@@H]([C@H](C(=O)O)O)O)O)O)O
54	Trans-Ferulic acid	2.64	141.1	195.065	194.058	1.3678	Pos	1.2874	0.36446	0.021972	1.6581	445858	KSEBMYQBYZTDHS-HWKANZROSA-N	COC1=C(C=CC(=C1)/C=C/C(=O)O)O
55	Caffeine	4.97	140.8	195.088	194.081	0.93547	Pos	1.6371	0.7111	0.12295	0.91028	2519	RYYVLZVUVIJVGH-UHFFFAOYSA-N	CN1C=NC2=C1C(=O)N(C(=O)N2C)C
56	5-(4-Hydroxypentyl)benzene-1,3-diol	8.28	159.7	195.103	196.11	0.27143	Neg	0.9309	-0.10331	0.6002	0.22171	129008856	PIJHLJYFYMNUMA-UHFFFAOYSA-N	CC(CCCC1=CC(=CC(=C1)O)O)O
57	(5AR,10aR)-Octahydrodipyrrolo[1,2-a:1',2'-D]pyrazine-5,10-dione	4.06	142.3	195.113	194.105	1.3671	Pos	1.3191	0.39956	0.02205	1.6566	529063	BKASXWPLSXFART-UHFFFAOYSA-N	C1CC2C(=O)N3CCCC3C(=O)N2C1
58	CHEBI:69439	4.86	144.1	197.128	196.121	0.48651	Pos	1.1347	0.18228	0.42686	0.36972	6992261	XLUAWXQORJEMBD-YUMQZZPRSA-N	CC(C)[C@H]1C(=O)N2CCC[C@H]2C(=O)N1
59	N-Acetyl-L-Histidine	0.96	143.3	198.087	197.079	0.58229	Pos	0.90132	-0.1499	0.34087	0.46741	75619	KBOJOGQFRVVWBH-ZETCQYMHSA-N	CC(=O)N[C@@H](CC1=CN=CN1)C(=O)O
60	Sebacic acid	7.04	143.6	201.113	202.121	0.13363	Neg	1.0296	0.04205	0.79661	0.098756	5192	CXMXRPHRNRROMY-UHFFFAOYSA-N	C(CCCCC(=O)O)CCCC(=O)O
61	1-(2-Hydroxyethyl)-2,2,6,6-tetramethyl-4-piperidinol	1.87	144.7	202.18	201.173	2.4193	Pos	1.344	0.42653	1.3318e-05	4.8756	104301	STEYNUVPFMIUOY-UHFFFAOYSA-N	CC1(CC(CC(N1CCO)(C)C)O)C
62	N-methyl-2-oxo-1H-quinoline-4-carboxamide	6.51	142.4	203.08	202.073	1.3895	Pos	1.4131	0.49891	0.019842	1.7024	47101396	DSBHNXVZUCLLBO-UHFFFAOYSA-N	CNC(=O)C1=CC(=O)NC2=CC=CC=C21
63	L-Tryptophan	4.31	151.1	203.083	204.09	0.84201	Neg	1.0963	0.13262	0.099407	1.0026	6305	QIVBCDIJIAJPQS-VIFPVBQESA-N	C1=CC=C2C(=C1)C(=CN2)C[C@@H](C(=O)O)N
64	DL-Tryptophan	4.31	141.7	203.083	204.09	0.80009	Neg	1.1037	0.14237	0.11796	0.92825	1148	QIVBCDIJIAJPQS-UHFFFAOYSA-N	C1=CC=C2C(=C1)C(=CN2)CC(C(=O)O)N
65	3-(1H-Benzimidazol-2-yl)propanohydrazide	5.06	140.8	203.092	204.1	0.77702	Neg	1.366	0.44996	0.12923	0.88863	829860	VYVKZESRBPHWIL-UHFFFAOYSA-N	C1=CC=C2C(=C1)NC(=N2)CCC(=O)NN
66	Ser-Pro	1.9	142.9	203.102	202.095	1.3695	Pos	0.74576	-0.42321	0.021807	1.6614	4369021	WBAXJMCUFIXCNI-WDSKDSINSA-N	C1C[C@H](N(C1)C(=O)[C@H](CO)N)C(=O)O
67	N-Acetyl-D-phenylalanine	5.9	146.6	206.082	207.09	0.22576	Neg	0.97411	-0.03785	0.66303	0.17846	101184	CBQJSKKFNMDLON-SNVBAGLBSA-N	CC(=O)N[C@H](CC1=CC=CC=C1)C(=O)O
68	Dexpanthenol	3.51	146.3	206.139	205.131	0.98335	Pos	1.6125	0.68932	0.10443	0.98117	131204	SNPLKNRPJHDVJA-UHFFFAOYSA-N	CC(C)(CO)[C@H](C(=O)NCCCO)O
69	N,7-dimethyl-2,3-dihydro-1,4-benzoxazine-4-carboxamide	4.43	146.3	207.113	206.106	0.74793	Pos	1.0898	0.12411	0.21967	0.65823	13881806	SSGFRKXJZGSXGD-UHFFFAOYSA-N	CC1=CC2=C(C=C1)N(CCO2)C(=O)NC
70	6-Nitro-2H-1,4-benzothiazin-3(4H)-one	0.87	152.7	211.016	210.009	0.12851	Pos	1.0124	0.017803	0.83428	0.078687	4182356	BALSKAVZBPPKCS-UHFFFAOYSA-N	C1C(=O)NC2=C(S1)C=CC(=C2)[N+](=O)[O-]
71	Cyclo(leucylprolyl)	5.74	150.3	211.144	210.136	0.8633	Pos	1.2423	0.31298	0.1554	0.80855	102892	SZJNCZMRZAUNQT-UHFFFAOYSA-N	CC(C)CC1C(=O)N2CCCC2C(=O)N1
72	L,L-Cyclo(leucylprolyl)	5.44	149	211.144	210.136	0.97708	Pos	1.3624	0.44616	0.10672	0.97174	7074739	SZJNCZMRZAUNQT-IUCAKERBSA-N	CC(C)C[C@H]1C(=O)N2CCC[C@H]2C(=O)N1
73	Indoxylsulfuric acid	5.12	142.9	212.002	213.009	0.85413	Neg	1.3496	0.43248	0.094487	1.0246	10258	BXFFHSIDQOFMLE-UHFFFAOYSA-N	C1=CC=C2C(=C1)C(=CN2)OS(=O)(=O)O
74	3-O-Methyl-L-DOPA	2.66	154.5	212.091	211.084	1.7469	Pos	1.317	0.39727	0.0028487	2.5454	9307	PFDUUKDQEHURQC-ZETCQYMHSA-N	COC1=C(C=CC(=C1)C[C@@H](C(=O)O)N)O
75	N-heptanoyl-homoserine lactone	6.43	151.5	212.129	213.137	0.30241	Neg	0.90799	-0.13926	0.55912	0.2525	443437	FTMZLSDESAOPSZ-VIFPVBQESA-N	CCCCCCC(=O)N[C@H]1CCOC1=O
76	5-oxo-1-piperidin-4-ylpyrrolidine-2-carboxamide	0.95	148.9	212.139	211.132	0.62509	Pos	1.0576	0.080765	0.30619	0.51401	86820478	ZSTPTLFOISLFEQ-UHFFFAOYSA-N	C1CC(=O)N(C1C(=O)N)C2CCNCC2
77	N-(7-azaspiro[3.5]nonan-3-yl)-2-methoxyacetamide	5.09	150.5	213.16	212.153	0.22414	Pos	1.1199	0.16335	0.71506	0.14566	90488099	DQIWVUNRTBPZER-UHFFFAOYSA-N	COCC(=O)NC1CCC12CCNCC2
78	Undecanedioic acid	7.73	148.6	215.129	216.136	0.29638	Neg	0.97331	-0.039024	0.56702	0.2464	15816	LWBHHRRTOZQPDM-UHFFFAOYSA-N	C(CCCCC(=O)O)CCCCC(=O)O
79	Nalpha-Acetyl-L-arginine	1.31	150.8	217.13	216.122	2.661	Pos	1.4699	0.55575	8.7218e-07	6.0594	102807	SNEIUMQYRCDYCH-UHFFFAOYSA-N	CC(=O)NC(CCCN=C(N)N)C(=O)O
80	Pantothenic acid	3.49	146.4	218.104	219.111	2.23	Neg	1.697	0.76294	1.1069e-06	5.9559	988	GHOKWGTUZJEAQD-UHFFFAOYSA-N	CC(C)(CO)C(C(=O)NCCC(=O)O)O
81	5-Methoxy-.alpha.-ethyltryptamine	4.49	157.7	219.148	218.141	0.22668	Pos	1.1315	0.17823	0.71197	0.14754	13679707	JHTPCKWBFLMJMQ-UHFFFAOYSA-N	CCC(CC1=CNC2=C1C=C(C=C2)OC)N
82	Ritalinic acid	5.29	150.9	220.133	219.126	0.29985	Pos	1.1904	0.2515	0.62507	0.20407	86863	INGSNVSERUZOAK-UHFFFAOYSA-N	C1CCNC(C1)C(C2=CC=CC=C2)C(=O)O
83	2,3-Dihydro-3-oxo-4H-1,4-benzoxazine-4-propionic acid	2.66	147.6	222.075	221.068	0.032779	Pos	1.0208	0.029634	0.95745	0.018883	3321885	BHULHAHXIGPYKV-UHFFFAOYSA-N	C1C(=O)N(C2=CC=CC=C2O1)CCC(=O)O
84	N-Acetyl-L-tyrosine	4.57	151.4	222.077	223.085	0.64282	Neg	1.1082	0.14817	0.21128	0.67514	68310	CAHKINHBCWCHCF-JTQLQIEISA-N	CC(=O)N[C@@H](CC1=CC=C(C=C1)O)C(=O)O
85	9H-Purine-6-thiol, 9-(tetrahydro-2-furyl)-	13.27	146.9	223.064	222.057	1.574	Pos	0.85894	-0.21936	0.007759	2.1102	3000792	DXIBRFHEZZOPFH-UHFFFAOYSA-N	C1CC(OC1)N2C=NC3=C2NC=NC3=S
86	Phe-Gly	2.58	151.7	223.108	222.1	1.7481	Pos	1.2325	0.30156	0.0028279	2.5485	6992304	GLUBLISJVJFHQS-VIFPVBQESA-N	C1=CC=C(C=C1)C[C@@H](C(=O)NCC(=O)O)N
87	PyroGlu-Pro	3.3	152.5	227.102	226.095	0.75365	Pos	0.91262	-0.13191	0.2161	0.66534	13306588	PFEJJYZYEFRQEA-UHFFFAOYSA-N	C1CC(N(C1)C(=O)C2CCC(=O)N2)C(=O)O
88	Pro-Leu	2.38	150.3	229.154	228.147	0.84002	Pos	0.88161	-0.18179	0.1671	0.77701	444109	ZKQOUHVVXABNDG-IUCAKERBSA-N	CC(C)C[C@@H](C(=O)O)NC(=O)[C@@H]1CCCN1
89	Tert-Butyl 4-(2-aminoethyl)-1-piperazinecarboxylate	1.99	154.4	230.186	229.179	1.0847	Pos	1.2063	0.27054	0.072343	1.1406	1514400	QSYTWBKZNNEKPN-UHFFFAOYSA-N	CC(C)(C)OC(=O)N1CCN(CC1)CCN
90	N,N-Dimethyldodecylamine-N-oxide	9.32	176.2	230.248	229.24	0.79381	Pos	0.52997	-0.91601	0.1922	0.71624	15433	SYELZBGXAIXKHU-UHFFFAOYSA-N	CCCCCCCCCCCC[N+](C)(C)[O-]
91	Isobutyryl carnitine	3.59	155	232.154	231.147	0.77794	Pos	1.2126	0.27811	0.20141	0.69592	168379	LRCNOZRCYBNMEP-SECBINFHSA-N	CC(C)C(=O)O[C@H](CC(=O)[O-])C[N+](C)(C)C
92	4-Fluoro-3-(trifluoromethyl)cinnamic acid	3.99	140.8	233.025	234.032	0.25939	Neg	0.9	-0.15201	0.61651	0.21006	5702897	DESJUJUEXMNIGB-DUXPYHPUSA-N	C1=CC(=C(C=C1/C=C/C(=O)O)C(F)(F)F)F
93	Lidocaine	5.32	157	235.181	234.173	0.2772	Pos	1.4018	0.48723	0.65151	0.18608	3676	NNJVILVZKWQKPM-UHFFFAOYSA-N	CCN(CC)CC(=O)NC1=C(C=CC=C1C)C
94	3-(Cyclohexylamino)-2-hydroxy-1-propanesulfonic acid	7.12	156.5	236.096	237.104	0.2604	Neg	1.0435	0.061368	0.61514	0.21103	2733480	INEWUCPYEUEQTN-UHFFFAOYSA-N	C1CCC(CC1)NCC(CS(=O)(=O)O)O
95	2-((3AR,4S,7R,7aS)-1,3-Dioxohexahydro-1H-4,7-methanoisoindol-2(3H)-yl)propanoic acid	2.9	156.4	238.107	237.1	0.41883	Pos	1.2044	0.26827	0.49434	0.30598	1933963	REFMTLIXGKZVDF-VRGHQRLXSA-N	C[C@@H](C(=O)O)N1C(=O)[C@@H]2[C@@H]3CC[C@@H](C3)[C@@H]2C1=O
96	Curvulin	5.98	152.6	239.091	238.084	0.51631	Pos	0.8892	-0.16942	0.39888	0.39916	177045	TURXCFUGBPBPRS-UHFFFAOYSA-N	CCOC(=O)CC1=C(C(=CC(=C1)O)O)C(=O)C
97	2-Furanpropanoic acid, 3-carboxy-4-methyl-5-propyl-	8.28	158.3	239.093	240.1	0.26263	Neg	0.92751	-0.10856	0.6121	0.21318	123979	WMCQWXZMVIETAO-UHFFFAOYSA-N	CCCC1=C(C(=C(O1)CCC(=O)O)C(=O)O)C
98	Uridine	2.03	150.5	243.063	244.07	2.1308	Neg	1.624	0.69957	4.3599e-06	5.3605	6029	DRTQHJPVMGBUCF-XVFCMESISA-N	C1=CN(C(=O)NC1=O)[C@H]2[C@@H]([C@@H]([C@H](O2)CO)O)O
99	1,11-Undecanedicarboxylic acid	9.12	158.2	243.16	244.168	0.20516	Neg	0.98062	-0.028235	0.69219	0.15978	10458	DXNCZXXFRKPEPY-UHFFFAOYSA-N	C(CCCCCC(=O)O)CCCCCC(=O)O
100	N-Acetyl-D-tryptophan	6.07	158.2	245.094	246.101	0.46363	Neg	0.93987	-0.089474	0.36926	0.43267	439917	DZTHIGRZJZPRDV-GFCCVEGCSA-N	CC(=O)N[C@H](CC1=CNC2=CC=CC=C21)C(=O)O
101	3-Benzylhexahydropyrrolo[1,2-a]pyrazine-1,4-dione	5.77	155.2	245.129	244.121	1.3855	Pos	1.6345	0.70884	0.020222	1.6942	99895	QZBUWPVZSXDWSB-UHFFFAOYSA-N	C1CC2C(=O)NC(C(=O)N2C1)CC3=CC=CC=C3
102	N-Acetyl-D-tryptophanamide	4.85	156.3	246.124	245.116	1.0037	Pos	1.0837	0.11594	0.097227	1.0122	799413	HNGIZKAMDMBRKJ-GFCCVEGCSA-N	CC(=O)N[C@H](CC1=CNC2=CC=CC=C21)C(=O)N
103	2-Methylbutyryl-L-carnitine	4.83	160.3	246.17	245.162	0.63887	Pos	1.1018	0.13984	0.29553	0.5294	9881339	IHCPDBBYTYJYIL-QVDQXJPCSA-N	CCC(C)C(=O)O[C@H](CC(=O)[O-])C[N+](C)(C)C
104	Isovalerylcarnitine	4.92	161.3	246.17	245.163	1.5081	Pos	2.0628	1.0446	0.011014	1.9581	169235	IGQBPDJNUXPEMT-SNVBAGLBSA-N	CC(C)CC(=O)O[C@H](CC(=O)[O-])C[N+](C)(C)C
105	Glu-Val	2.78	161.5	247.129	246.121	0.94014	Pos	1.118	0.1609	0.12104	0.91707	6992567	SITLTJHOQZFJGG-XPUUQOCRSA-N	CC(C)[C@@H](C(=O)O)NC(=O)[C@H](CCC(=O)O)N
106	Asp-Ile	3.86	163.6	247.129	246.122	0.30765	Pos	1.0371	0.052546	0.61608	0.21036	21845165	BSWHERGFUNMWGS-UHFFFAOYSA-N	CCC(C)C(C(=O)O)NC(=O)C(CC(=O)O)N
107	N,N-dimethyl-1-(2-methylphenyl)-5-oxopyrrolidine-3-carboxamide	6.39	158.1	247.144	246.136	1.0524	Pos	1.5887	0.66784	0.081602	1.0883	17080713	RUBYGVSLCKLSSY-UHFFFAOYSA-N	CC1=CC=CC=C1N2CC(CC2=O)C(=O)N(C)C
108	2-Acetamido-3-(4-hydroxy-3-methoxyphenyl)propanoic acid	4.9	157	252.088	253.095	0.16746	Neg	1.0423	0.05974	0.74666	0.12688	12681285	UKDKTHYZLXZOSS-UHFFFAOYSA-N	CC(=O)NC(CC1=CC(=C(C=C1)O)OC)C(=O)O
109	Tyr-Ala	3.45	159.5	253.118	252.111	1.8498	Pos	1.9203	0.94136	0.0014743	2.8314	5496455	NLKUJNGEGZDXGO-XVKPBYJWSA-N	C[C@@H](C(=O)O)NC(=O)[C@H](CC1=CC=C(C=C1)O)N
110	Palmitic amide	13.45	183.9	256.263	255.256	0.25454	Pos	1.0659	0.092097	0.67838	0.16853	69421	HSEMFIZWXHQJAE-UHFFFAOYSA-N	CCCCCCCCCCCCCCCC(=O)N
111	Ribothymidine	2.74	156.2	257.078	258.085	1.2927	Neg	1.1402	0.18932	0.0097543	2.0108	445408	DWRXFEITVBNRMK-JXOAFFINSA-N	CC1=CN(C(=O)NC1=O)[C@H]2[C@@H]([C@@H]([C@H](O2)CO)O)O
112	Palmitic acid	0.52	181.6	257.247	256.24	2.6399	Pos	0.50771	-0.97793	1.1316e-06	5.9463	985	IPCSVZSSVZVIGE-UHFFFAOYSA-N	CCCCCCCCCCCCCCCC(=O)O
113	Isopalmitic acid	4.08	180.3	257.248	256.241	1.3111	Pos	0.57851	-0.78958	0.028486	1.5454	36247	ZONJATNKKGGVSU-UHFFFAOYSA-N	CC(C)CCCCCCCCCCCCC(=O)O
114	Homovanillic acid sulfate	3.82	155.2	261.008	262.015	1.4157	Neg	1.3544	0.43761	0.0043365	2.3629	29981063	IACOAKYXFIWAQN-UHFFFAOYSA-N	COC1=C(C=CC(=C1)CC(=O)O)OS(=O)(=O)O
115	Gamma-Glu-Leu	4.47	167.1	261.144	260.137	2.1694	Pos	1.2684	0.34305	0.00013486	3.8701	151023	MYFMARDICOWMQP-YUMQZZPRSA-N	CC(C)C[C@@H](C(=O)O)NC(=O)CC[C@@H](C(=O)O)N
116	Ropinirole	5.32	164.8	261.196	260.189	0.32762	Pos	1.2055	0.2696	0.5933	0.22673	5095	UHSKFQJFRQCDBE-UHFFFAOYSA-N	CCCN(CCC)CCC1=C2CC(=O)NC2=CC=C1
117	Hexylcaine	13.4	164.4	262.18	261.173	0.25457	Pos	1.1184	0.16144	0.67835	0.16855	10770	DKLKMKYDWHYZTD-UHFFFAOYSA-N	CC(CNC1CCCCC1)OC(=O)C2=CC=CC=C2
118	1-(2,4-Dihydroxyphenyl)-2-(4-fluorophenoxy)ethanone	0.86	153.4	263.074	262.066	0.74964	Pos	1.1045	0.14341	0.2186	0.66036	677519	CBRIRMIPKKNABJ-UHFFFAOYSA-N	C1=CC(=CC=C1OCC(=O)C2=C(C=C(C=C2)O)O)F
119	Phenylacetyl-L-glutamine	5.13	160.5	265.118	264.111	0.24691	Pos	1.078	0.10841	0.68752	0.16272	92258	JFLIEFSWGNOPJJ-JTQLQIEISA-N	C1=CC=C(C=C1)CC(=O)N[C@@H](CCC(=O)N)C(=O)O
120	Laurylsulfuric acid	12.11	166.8	265.148	266.156	0.90911	Neg	1.2428	0.31354	0.074497	1.1279	8778	MOTZDAYCYVMXPC-UHFFFAOYSA-N	CCCCCCCCCCCCOS(=O)(=O)O
121	3-Deoxy-D-glycero-D-galacto-2-nonulosonic acid	0.96	149.9	267.073	268.08	0.77854	Neg	1.2406	0.3111	0.12847	0.89121	13991616	CLRLHXKNIYJWAW-QBTAGHCHSA-N	C1[C@@H]([C@H]([C@@H](OC1(C(=O)O)O)[C@@H]([C@@H](CO)O)O)O)O
122	Inosine	2.46	157.9	267.074	268.081	2.3224	Neg	1.4671	0.55293	2.7077e-07	6.5674	135398641	UGQMRVRMYYASKQ-KQYNXXCUSA-N	C1=NC(=O)C2=C(N1)N(C=N2)[C@H]3[C@@H]([C@@H]([C@H](O3)CO)O)O
123	2-Hydroxypalmitic acid	13.12	173	271.228	272.236	1.7362	Neg	0.74712	-0.4206	0.00033441	3.4757	92836	JGHSBPIZNUXPLA-UHFFFAOYSA-N	CCCCCCCCCCCCCCC(C(=O)O)O
124	3-{[(4-Pyridinylmethyl)amino]carbonyl}-7-oxabicyclo[2.2.1]hept-5-ene-2-carboxylic acid	4.43	161.8	273.087	274.094	0.75153	Neg	0.9113	-0.134	0.14261	0.84586	240655	NJOCHFDYBDTNNY-UHFFFAOYSA-N	C1=CC2C(C(C1O2)C(=O)NCC3=CC=NC=C3)C(=O)O
125	N-Acetylneuraminic acid, 2,3-dehydro-2-deoxy-	0.96	158.9	274.092	291.095	0.22818	Pos	1.0223	0.031793	0.71015	0.14865	71312796	JINJZWSZQKHCIP-KLBWXOEVSA-N	CC(=O)NC1[C@H](C=C(O[C@H]1[C@@H]([C@@H](CO)O)O)C(=O)O)O
126	Gln-Glu	0.92	157.2	274.105	275.112	0.068267	Neg	1.0084	0.012101	0.89527	0.048044	7020029	OWOFCNWTMWOOJJ-WDSKDSINSA-N	C(CC(=O)N)[C@@H](C(=O)N[C@@H](CCC(=O)O)C(=O)O)N
127	L-Glutarylcarnitine	2.83	163.2	276.144	275.137	0.060717	Pos	1.0139	0.019873	0.92128	0.03561	71317118	NXJAXUYOQLTISD-SECBINFHSA-N	C[N+](C)(C)C[C@@H](CC(=O)[O-])OC(=O)CCCC(=O)O
128	Octyl hydrogen phthalate	12.18	170.4	279.159	278.152	0.35005	Pos	0.9537	-0.068393	0.56817	0.24553	79362	PKIYFBICNICNGJ-UHFFFAOYSA-N	CCCCCCCCOC(=O)C1=CC=CC=C1C(=O)O
129	9Z,11E,13E-Octadecatrienoic acid	12.18	182.6	279.231	278.224	0.26119	Pos	0.91511	-0.12798	0.67045	0.17364	5281115	CUXYLFPMQMFGPL-WPOADVJFSA-N	CCCC/C=C/C=C/C=C\CCCCCCCC(=O)O
130	(9E,11Z)-8-Hydroxyoctadeca-9,11-dienoic acid	12.29	187.5	279.232	296.235	0.82913	Pos	0.66514	-0.58828	0.17279	0.76248	45359531	NTYHQKJCCYNCMG-LMEHAKNHSA-N	CCCCCC/C=C\C=C\C(CCCCCCC(=O)O)O
131	Linoleamide	10.86	189.3	280.263	279.256	0.90861	Pos	1.3364	0.41838	0.13437	0.87171	6435901	SFIHQZFZMWZOJV-HZJYTTRNSA-N	CCCCC/C=C\C/C=C\CCCCCCCC(=O)N
132	Brefeldin A	12	180.9	281.172	280.165	0.22315	Pos	1.0224	0.031968	0.71626	0.14493	5287620	KQNZDYYTLMIZCT-KQPMLPITSA-N	C[C@H]1CCC/C=C/[C@@H]2C[C@@H](C[C@H]2[C@@H](/C=C/C(=O)O1)O)O
133	Linoelaidic acid	10.92	186	281.248	280.241	0.88962	Pos	1.1808	0.23976	0.14291	0.84494	5282457	OYHQOLUKZRVURQ-AVQMFFATSA-N	CCCCC/C=C/C/C=C/CCCCCCCC(=O)O
134	Linoleic acid	10.03	188.2	281.248	280.241	0.44685	Pos	1.2395	0.30972	0.46575	0.33185	5280450	OYHQOLUKZRVURQ-HZJYTTRNSA-N	CCCCC/C=C\C/C=C\CCCCCCCC(=O)O
135	1-Methyladenosine	1.83	164.9	282.12	281.112	1.3563	Pos	1.2041	0.26792	0.023183	1.6348	27476	GFYLSDSUCHVORB-IOSLPCCCSA-N	CN1C=NC2=C(C1=N)N=CN2[C@H]3[C@@H]([C@@H]([C@H](O3)CO)O)O
136	Oleamide	13.71	189.9	282.279	281.272	0.76779	Pos	0.77364	-0.37026	0.20746	0.68306	5283387	FATBGEAMYMYZAF-KTKRTIGZSA-N	CCCCCCCC/C=C\CCCCCCCC(=O)N
137	Xanthosine	2.84	158.4	283.069	284.077	1.6622	Neg	1.4676	0.55342	0.0006443	3.1909	64959	UBORTCNDUKBEOP-UUOKFMHZSA-N	C1=NC2=C(N1[C@H]3[C@@H]([C@@H]([C@H](O3)CO)O)O)NC(=O)NC2=O
138	Stearamide	12.79	190.6	284.295	283.288	0.68751	Pos	0.81815	-0.28955	0.25983	0.58531	31292	LYRFLYHAGKPMFH-UHFFFAOYSA-N	CCCCCCCCCCCCCCCCCC(=O)N
139	CETRIMONIUM	11.06	196.5	284.331	283.324	1.3	Pos	0.60821	-0.71736	0.02994	1.5238	2681	RLGQACBPNDBWTB-UHFFFAOYSA-N	CCCCCCCCCCCCCCCC[N+](C)(C)C
140	Stearic acid	0.52	188.5	285.279	284.272	2.4629	Pos	0.52497	-0.92969	8.4683e-06	5.0722	5281	QIQXTHQIDYTFRH-UHFFFAOYSA-N	CCCCCCCCCCCCCCCCCC(=O)O
141	7-Aminoclonazepam	5.43	165.5	286.076	285.069	0.34726	Pos	1.1573	0.21074	0.57127	0.24316	188298	HEFRPWRJTGLSSV-UHFFFAOYSA-N	C1C(=O)NC2=C(C=C(C=C2)N)C(=N1)C3=CC=CC=C3Cl
142	Piperine	9.9	177.4	286.144	285.136	0.020794	Pos	0.99094	-0.013135	0.973	0.011886	638024	MXXWOMGUGJBKIW-YPCIICBESA-N	C1CCN(CC1)C(=O)/C=C/C=C/C2=CC3=C(C=C2)OCO3
143	N,N-Bis(2-hydroxyethyl)dodecanamide	10.32	186.5	288.254	287.246	0.30031	Pos	0.951	-0.072478	0.62455	0.20443	8430	AOMUHOFOVNGZAN-UHFFFAOYSA-N	CCCCCCCCCCCC(=O)N(CCO)CCO
144	1-methylsulfonyl-N-(1,3-thiazol-2-yl)piperidine-3-carboxamide	6.23	181.1	290.064	289.057	0.19794	Pos	1.1239	0.1685	0.74719	0.12657	44086304	KORBBFBFTOFFHN-UHFFFAOYSA-N	CS(=O)(=O)N1CCCC(C1)C(=O)NC2=NC=CS2
145	Glu-Phe	4.79	166.6	293.115	294.122	0.9238	Neg	1.1641	0.21923	0.069764	1.1564	18653118	XMBSYZWANAQXEV-QWRGUYRKSA-N	C1=CC=C(C=C1)C[C@@H](C(=O)O)NC(=O)[C@H](CCC(=O)O)N
146	9(10)-Epoxy-12Z-octadecenoic acid	12.96	182.1	297.24	296.233	1.9623	Pos	1.3285	0.40979	0.00067687	3.1695	6246154	FBUKMFOXMZRGRB-YFHOEESVSA-N	CCCCC/C=C\CC1C(O1)CCCCCCCC(=O)O
147	12(13)-Epoxy-9Z-octadecenoic acid	12.26	183.7	297.242	296.235	0.43931	Pos	0.83797	-0.25503	0.47336	0.32481	5356421	CCPPLLJZDQAOHD-FLIBITNWSA-N	CCCCCC1C(O1)C/C=C\CCCCCCCC(=O)O
148	3-Oxostearic acid	11.74	177.7	297.244	298.251	0.20381	Neg	1.1114	0.15232	0.69411	0.15857	5283005	YQGGUZWHNVQJMF-UHFFFAOYSA-N	CCCCCCCCCCCCCCCC(=O)CC(=O)O
149	5'-S-Methyl-5'-thioadenosine	4.25	171.6	298.097	297.09	0.66541	Pos	0.85288	-0.22958	0.27567	0.55961	439176	WUUGFSXJNOTRMR-IOSLPCCCSA-N	CSC[C@@H]1[C@H]([C@H]([C@@H](O1)N2C=NC3=C2N=CN=C3N)O)O
150	3-ketosphingosine	12.02	187.9	298.274	297.267	0.79862	Pos	1.2199	0.28674	0.18948	0.72245	9839212	VWTPJNGTEYZXFV-ZWKQNVPVSA-N	CCCCCCCCCCCCC/C=C/C(=O)[C@H](CO)N
151	N-Acetyl-D-galactosamine 4-sulfate	0.91	162.9	300.04	301.047	0.28593	Neg	1.0858	0.1187	0.5808	0.23597	170758	RKFMAQNDSSSRTH-OSMVPFSASA-N	CC(=O)N[C@@H](C=O)[C@H]([C@H]([C@@H](CO)O)OS(=O)(=O)O)O
152	N-Acetylaspartylglutamic acid	1.97	159.6	303.084	304.091	0.67286	Neg	1.167	0.22276	0.19035	0.72045	5255	OPVPGKGADVGKTG-UHFFFAOYSA-N	CC(=O)NC(CC(=O)O)C(=O)NC(CCC(=O)O)C(=O)O
153	N-Acetylneuraminic acid	0.89	164.1	308.099	309.106	0.079804	Neg	0.97517	-0.036279	0.8777	0.056653	439197	SQVRNKJHWKZAKO-LUWBGTNYSA-N	CC(=O)N[C@@H]1[C@H](CC(O[C@H]1[C@@H]([C@@H](CO)O)O)(C(=O)O)O)O
154	N-Acetyl-a-neuraminic acid	0.9	159.1	308.099	309.106	0.37121	Neg	1.0531	0.074662	0.47293	0.32521	444885	SQVRNKJHWKZAKO-YRMXFSIDSA-N	CC(=O)N[C@@H]1[C@H](C[C@@](O[C@H]1[C@@H]([C@@H](CO)O)O)(C(=O)O)O)O
155	N,N-Dimethylguanosine	3.65	172.1	310.116	311.123	0.40856	Neg	1.0537	0.075449	0.42928	0.36726	135501639	RSPURTUNRHNVGF-IOSLPCCCSA-N	CN(C)C1=NC2=C(C(=O)N1)N=CN2[C@H]3[C@@H]([C@@H]([C@H](O3)CO)O)O
156	N-cis-tetradec-9Z-enoyl-L-Homoserine lactone	8.16	182.6	310.238	309.231	0.004008	Pos	1.0009	0.0012324	0.9948	0.0022663	35028743	CNVCBUGVTPVVJB-KJPDOMRESA-N	CCCC/C=C\CCCCCCCC(=O)N[C@H]1CCOC1=O
157	Ala-Asp-OH	2.02	167.1	311.051	312.058	1.7321	Neg	1.4214	0.5073	0.00034731	3.4593	6993141	ZEMLEJZWLPVYOC-ONGXEEELSA-N	C[C@@H](C(=O)N[C@@H](CC(=O)O)C(=O)O)NC(=O)OCC1=CC=CC=C1
158	[3-[5-(1-methylpyrrolidin-2-yl)-1,2,4-oxadiazol-3-yl]azetidin-1-yl]-pyrazin-2-ylmethanone	0.73	176.2	315.157	314.15	0.87355	Pos	0.74408	-0.42648	0.15044	0.82262	91921496	DQJSHFJRIZZOFP-UHFFFAOYSA-N	CN1CCCC1C2=NC(=NO2)C3CN(C3)C(=O)C4=NC=CN=C4
159	3-(Hexadecyloxy)-1,2-propanediol	13.09	200.1	317.305	316.298	0.40388	Pos	1.1932	0.25486	0.50996	0.29247	72733	OOWQBDFWEXAXPB-UHFFFAOYSA-N	CCCCCCCCCCCCCCCCOCC(CO)O
160	Dodecylbenzenesulfonic acid	10.98	196.8	325.185	326.192	0.17945	Neg	1.0536	0.075261	0.72918	0.13716	25457	WBIQQQGBSDOWNP-UHFFFAOYSA-N	CCCCCCCCCCCCC1=CC=CC=C1S(=O)(=O)O
161	Acetaminophen glucuronide	2.74	180.1	326.089	327.096	1.001	Neg	0.014508	-6.107	0.048682	1.3126	83944	IPROLSVTVHAQLE-BYNIDDHOSA-N	CC(=O)NC1=CC=C(C=C1)O[C@H]2[C@@H]([C@H]([C@@H]([C@H](O2)C(=O)O)O)O)O
162	9-Nitrooleic acid	8.79	182.7	326.234	327.241	0.091896	Neg	1.0277	0.039411	0.85935	0.065832	11645581	CQOAKBVRRVHWKV-SAPNQHFASA-N	CCCCCCCC/C=C(\CCCCCCCC(=O)O)/[N+](=O)[O-]
163	Ac-Asp-Glu	2.14	167.8	327.08	304.091	0.20021	Pos	1.0416	0.058808	0.74439	0.1282	188803	OPVPGKGADVGKTG-BQBZGAKWSA-N	CC(=O)N[C@@H](CC(=O)O)C(=O)N[C@@H](CCC(=O)O)C(=O)O
164	Cis-4,7,10,13,16,19-Docosahexaenoic acid	13.33	184.5	327.234	328.241	1.175	Neg	0.82018	-0.28598	0.019614	1.7074	445580	MBMBGCFOFBJSGT-KUBAVDMBSA-N	CC/C=C\C/C=C\C/C=C\C/C=C\C/C=C\C/C=C\CCC(=O)O
165	Coproporphyrin I	8.68	300	328.142	654.27	0.28768	Pos	1.0457	0.064517	0.63922	0.19435	68271	VCCUOZSDXVZCSK-UHFFFAOYSA-N	CC1=C(C2=CC3=NC(=CC4=NC(=CC5=C(C(=C(N5)C=C1N2)CCC(=O)O)C)C(=C4C)CCC(=O)O)C(=C3C)CCC(=O)O)CCC(=O)O
166	(4Z,7Z,10Z,13Z,16Z,19Z)-4,7,10,13,1 6,19-Docosahexaenoic acid	13.33	183.4	329.247	328.24	0.14002	Pos	1.0235	0.033498	0.81968	0.086355	40486925	MBMBGCFOFBJSGT-KUBAVDMBSA-M	CC/C=C\C/C=C\C/C=C\C/C=C\C/C=C\C/C=C\CCC(=O)[O-]
167	Asp Glu Ala	0.9	182.9	334.122	333.115	0.64885	Pos	0.86929	-0.20208	0.28796	0.54067	145454419	VAWNQIGQPUOPQW-ACZMJKKPSA-N	C[C@@H](C(=O)O)NC(=O)[C@H](CCC(=O)O)NC(=O)[C@H](CC(=O)O)N
168	13Z-Docosenamide	13.94	200.3	338.342	337.335	2.4364	Pos	0.38552	-1.3751	1.1171e-05	4.9519	5365371	UAUDZVJPLUQNMU-KTKRTIGZSA-N	CCCCCCCC/C=C\CCCCCCCCCCCC(=O)N
169	2,3-Dinorthromboxane B1	10.77	185.3	343.213	344.221	0.6087	Neg	1.314	0.394	0.23695	0.62534	101668701	LGWCOUWMTAQMQT-QCBHMXSDSA-N	CCCCC[C@@H](/C=C/[C@@H]1[C@H]([C@H](CC(O1)O)O)CCCCC(=O)O)O
170	Leu Asp Cys	2.46	179.8	350.138	349.131	0.078788	Pos	0.97669	-0.034021	0.89796	0.046745	145456367	FGNQZXKVAZIMCI-CIUDSAMLSA-N	CC(C)C[C@@H](C(=O)N[C@@H](CC(=O)O)C(=O)N[C@@H](CS)C(=O)O)N
171	Docosahexaenoic acid ethyl ester	10.83	190.8	357.279	356.272	1.0373	Pos	1.6495	0.72206	0.086217	1.0644	6440152	TYLNXKAVUJJPMU-DNKOKRCQSA-N	CCCCCCCCC/C=C/C=C/C=C/C=C/C=C/C=C/C(=O)OCC
172	Cortisol	7.24	189.7	363.218	362.211	0.36039	Pos	0.95438	-0.067371	0.55675	0.25434	5754	JYGXADMDTFJGBT-VWUMJDOOSA-N	C[C@]12CCC(=O)C=C1CC[C@@H]3[C@@H]2[C@H](C[C@]4([C@H]3CC[C@@]4(C(=O)CO)O)C)O
173	ethyl 1-[(5-methyl-7-pyrrolidin-1-yl-[1,2,4]triazolo[1,5-a]pyrimidin-2-yl)methyl]piperidine-3-carboxylate	6.47	188	373.234	372.227	0.33354	Pos	0.92124	-0.11836	0.58662	0.23164	53202330	LVWWNJAYZZRFOY-UHFFFAOYSA-N	CCOC(=O)C1CCCN(C1)CC2=NN3C(=CC(=NC3=N2)C)N4CCCC4
174	N-Succinyl-5-aminoimidazole-4-carboxamide ribose	2.6	187.7	375.115	374.108	1.387	Pos	0.62807	-0.67099	0.020072	1.6974	54478644	XNKLTOHYNRQCLJ-ZZZDFHIKSA-N	C1=NC(=C(N1[C@H]2[C@@H]([C@@H]([C@H](O2)CO)O)O)N)C(=O)N[C@@H](CC(=O)O)C(=O)O
175	Donepezil	6.61	197.4	380.222	379.215	0.22537	Pos	1.103	0.1414	0.71356	0.14657	3152	ADEBPBSSDYVVLD-UHFFFAOYSA-N	COC1=C(C=C2C(=C1)CC(C2=O)CC3CCN(CC3)CC4=CC=CC=C4)OC
176	Bis(p-methylbenzylidene)sorbitol	0.19	197.1	387.181	386.174	1.5942	Pos	0.18938	-2.4006	0.0069465	2.1582	11069095	HDUNAIVOFOKALD-RLCYQCIGSA-N	CC1=CC=C(C=C1)C2OC[C@@H](O2)[C@H]([C@@H]([C@@H]3COC(O3)C4=CC=C(C=C4)C)O)O
177	Gln-Leu-Lys	5.11	184.4	388.254	387.247	0.60356	Pos	0.8205	-0.28543	0.32334	0.49034	11257711	IULKWYSYZSURJK-AVGNSLFASA-N	CC(C)C[C@@H](C(=O)N[C@@H](CCCCN)C(=O)O)NC(=O)[C@H](CCC(=O)N)N
178	Di(2-ethylhexyl) phthalate	0.04	212.5	391.285	390.278	1.9912	Pos	0.73384	-0.44647	0.00054837	3.2609	8343	BJQHLKABXJIVAM-UHFFFAOYSA-N	CCCCC(CC)COC(=O)C1=CC=CC=C1C(=O)OCC(CC)CCCC
179	Deoxycholic acid	10.83	202	391.286	392.293	0.98131	Neg	1.7594	0.8151	0.053489	1.2717	222528	KXGVEGMKQFWNSR-LLQZFEROSA-N	C[C@H](CCC(=O)O)[C@H]1CC[C@@H]2[C@@]1([C@H](C[C@H]3[C@H]2CC[C@H]4[C@@]3(CC[C@H](C4)O)C)O)C
180	2-{[4-(Dipentylamino)-2-hydroxyphenyl]carbonyl}benzoic acid	13.27	209.6	398.233	397.226	0.021705	Pos	1.0095	0.013697	0.97182	0.012414	1910889	FHHJEXZQGLHKOT-UHFFFAOYSA-N	CCCCCN(CCCCC)C1=CC(=C(C=C1)C(=O)C2=CC=CC=C2C(=O)O)O
181	Tris(butoxyethyl)phosphate	11.87	198.4	399.251	398.244	0.28191	Pos	0.90403	-0.14556	0.64597	0.18978	6540	WTLBZVNBAKMVDP-UHFFFAOYSA-N	CCCCOCCOP(=O)(OCCOCCCC)OCCOCCCC
182	Sitagliptin	5.97	193.8	408.125	407.118	0.051367	Pos	0.97039	-0.043357	0.93337	0.029946	4369359	MFFMDFFZMYYVKS-SECBINFHSA-N	C1CN2C(=NN=C2C(F)(F)F)CN1C(=O)C[C@@H](CC3=CC(=C(C=C3F)F)F)N
183	1-([1]benzofuro[3,2-d]pyrimidin-4-yl)-N-[(4-ethylphenyl)methyl]piperidine-3-carboxamide	10.65	203.1	415.212	414.205	1.0124	Pos	0.4893	-1.0312	0.094284	1.0256	50835076	ZKDGXQJPCQTNTR-UHFFFAOYSA-N	CCC1=CC=C(C=C1)CNC(=O)C2CCCN(C2)C3=NC=NC4=C3OC5=CC=CC=C54
184	2-[8-[cyclohexyl(methyl)amino]-3-oxo-[1,2,4]triazolo[4,3-a]pyrazin-2-yl]-N-(2,4,6-trimethylphenyl)acetamide	12.63	218.3	423.252	422.245	0.52073	Pos	0.91924	-0.12149	0.39483	0.40359	53142435	MAWOCUCGAZABPS-UHFFFAOYSA-N	CC1=CC(=C(C(=C1)C)NC(=O)CN2C(=O)N3C=CN=C(C3=N2)N(C)C4CCCCC4)C
185	7.alpha.-Hydroxy-3-oxo-4-cholestenoic acid	11.54	220.7	431.316	430.309	0.1077	Pos	1.013	0.018681	0.86083	0.065081	91746147	SATGKQGFUDXGAX-SLTBQWEQSA-N	C[C@H](CCC[C@@H](C)C(=O)O)[C@H]1CC[C@@H]2[C@@]1(CC[C@H]3[C@H]2[C@@H](CC4=CC(=O)CC[C@]34C)O)C
186	(R)-4-((3S,5R,8R,9S,10S,13R,14S,17R)-3-hydroxy-4,4,10,13,14-pentamethyl-7,11-dioxohexadecahydro-1H-cyclopenta[a]phenanthren-17-yl)pentanoic acid	9.76	224.3	447.311	446.304	0.17434	Pos	1.0178	0.025396	0.77651	0.10985	219835	DFWCSGAJNBBVMR-JYHUSGTRSA-N	C[C@H](CCC(=O)O)[C@H]1CC[C@@]2([C@@]1(CC(=O)[C@H]3[C@H]2C(=O)C[C@@H]4[C@@]3(CC[C@@H](C4(C)C)O)C)C)C
187	6-Sialylgalactose	0.89	203.8	470.152	471.159	0.94671	Neg	1.1775	0.23569	0.062864	1.2016	169679	NLTUGNYYOIVQSD-XRLCZLRQSA-N	CC(=O)N[C@@H]1[C@H](C[C@@](O[C@H]1[C@@H]([C@@H](CO)O)O)(C(=O)O)OC[C@H]([C@@H]([C@@H]([C@H](C=O)O)O)O)O)O
188	Folinic acid	4.19	197.9	474.173	473.166	0.8957	Pos	1.1102	0.15087	0.14013	0.85347	135403648	VVIAGPKUTFNRDU-ABLWVSNPSA-N	C1C(N(C2=C(N1)N=C(NC2=O)N)C=O)CNC3=CC=C(C=C3)C(=O)N[C@@H](CCC(=O)O)C(=O)O
189	1-(1Z-Hexadecenyl)-sn-glycero-3-phosphocholine	11.72	229.7	480.345	479.338	0.18902	Pos	0.96664	-0.048951	0.75823	0.1202	10917802	HTZINLFNXLXRBC-CQLBIITFSA-N	CCCCCCCCCCCCCC/C=C\OC[C@H](COP(=O)([O-])OCC[N+](C)(C)C)O
190	1-Hexadecyl-sn-glycero-3-phosphocholine	11.73	233.7	482.359	481.352	0.05246	Pos	0.99252	-0.010833	0.93195	0.030605	162126	VLBPIWYTPAXCFJ-XMMPIXPASA-N	CCCCCCCCCCCCCCCCOC[C@H](COP(=O)([O-])OCC[N+](C)(C)C)O
191	1-Palmitoyl-sn-glycero-3-phosphocholine	11.37	232.8	496.34	495.333	0.92167	Pos	0.89165	-0.16546	0.12872	0.89035	460602	ASWBNKHCZGQVJV-HSZRJFAPSA-N	CCCCCCCCCCCCCCCC(=O)OC[C@H](COP(=O)([O-])OCC[N+](C)(C)C)O
192	1-(1Z-Octadecenyl)-sn-glycero-3-phosphocholine	12.04	236.1	508.375	507.368	0.24524	Pos	0.96812	-0.046739	0.68953	0.16144	24779527	WBOMIOWRFSPZMC-AYICAFKVSA-N	CCCCCCCCCCCCCCCC/C=C\OC[C@H](COP(=O)([O-])OCC[N+](C)(C)C)O
193	Telmisartan	7.72	231.2	515.245	514.237	1.1581	Pos	5.1575	2.3667	0.054428	1.2642	65999	RMMXLENWKUUMAY-UHFFFAOYSA-N	CCCC1=NC2=C(N1CC3=CC=C(C=C3)C4=CC=CC=C4C(=O)O)C=C(C=C2C)C5=NC6=CC=CC=C6N5C
194	3-Hydroxy-2-((9Z,12Z)-octadeca-9,12-dienoyloxy)propyl 2-(trimethylazaniumyl)ethyl phosphate	10.97	229.7	520.34	519.333	1.1434	Pos	0.79608	-0.32901	0.05769	1.2389	24871190	LSUXCWJOIAWGOU-UTJQPWESSA-N	CCCCC/C=C\C/C=C\CCCCCCCC(=O)OC(CO)COP(=O)([O-])OCC[N+](C)(C)C
195	1-Oleoyl-sn-glycero-3-phosphocholine	11.67	235.5	522.356	521.349	1.4625	Pos	0.83857	-0.25399	0.013891	1.8573	16081932	YAMUFBLWGFFICM-PTGWMXDISA-N	CCCCCCCC/C=C\CCCCCCCC(=O)OC[C@H](COP(=O)([O-])OCC[N+](C)(C)C)O
196	1-O-Hexadecyl-2-O-acetyl-sn-glyceryl-3-phosphorylcholine	12.37	241.5	524.37	523.363	1.8375	Pos	0.74874	-0.41746	0.0015999	2.7959	108156	HVAUUPRFYPCOCA-AREMUKBSSA-N	CCCCCCCCCCCCCCCCOC[C@H](COP(=O)([O-])OCC[N+](C)(C)C)OC(=O)C
197	1-Stearoyl-2-hydroxy-sn-glycero-3-phosphocholine	12.65	240.1	524.372	523.364	1.8022	Pos	0.71707	-0.47982	0.0020119	2.6964	497299	IHNKQIMGVNPMTC-RUZDIDTESA-N	CCCCCCCCCCCCCCCCCC(=O)OC[C@H](COP(=O)([O-])OCC[N+](C)(C)C)O
198	Bilirubin	7.98	244	585.271	584.264	0.32703	Pos	1.1101	0.15066	0.59397	0.22623	5280352	BPYKTIZUTYGOLE-IFADSCNNSA-N	CC1=C(NC(=C1CCC(=O)O)CC2=C(C(=C(N2)/C=C\3/C(=C(C(=O)N3)C)C=C)C)CCC(=O)O)/C=C\4/C(=C(C(=O)N4)C=C)C
199	N-Acetylneuraminic acid dimer	0.96	228.2	623.191	600.202	0.00076141	Pos	1.0001	0.00015396	0.99901	0.00042963	91746156	RBHZITKOXCMFCZ-LBLOFTIXSA-N	CC(=O)N[C@H]1[C@@H](CC(OC1[C@@H]([C@@H](CO)O)O)(C(=O)O)O[C@H](CO)[C@H]([C@@H]([C@@H]([C@H](CC(=O)C(=O)O)O)NC(=O)C)O)O)O
200	3'-Sialyllactose	0.92	241.5	632.205	633.212	0.1952	Neg	1.0471	0.066387	0.70643	0.15093	123914	OIZGSVFYNBZVIK-FHHHURIISA-N	CC(=O)N[C@@H]1[C@H](C[C@@](O[C@H]1[C@@H]([C@@H](CO)O)O)(C(=O)O)O[C@H]2[C@H]([C@H](O[C@H]([C@@H]2O)O[C@H]([C@@H](CO)O)[C@@H]([C@H](C=O)O)O)CO)O)O
201	6'-Sialyl-N-acetyllactosamine	0.96	244.9	673.231	674.239	0.61273	Neg	0.92945	-0.10555	0.23382	0.63113	16212424	RPSBVJXBTXEJJG-RAMSCCQBSA-N	CC(=O)N[C@@H]1[C@H](C[C@](O[C@H]1[C@@H]([C@@H](CO)O)O)(C(=O)O)OC[C@@H]2[C@@H]([C@@H]([C@H]([C@@H](O2)O[C@@H]3[C@H](OC([C@@H]([C@H]3O)NC(=O)C)O)CO)O)O)O)O
RT, retention time; CCS, collision cross section; m/z meas., measured mass-to-charge ratio; M meas., measured neutral mass; VIP, variable importance in projection; FC, fold change (post/pre); InChIKey, International Chemical Identifier Key.	6'-Sialyl-N-acetyllactosamine	0.96	244.9	673.231	674.239	0.61273	Neg	0.92945	-0.10555	0.23382	0.63113	16212424	RPSBVJXBTXEJJG-RAMSCCQBSA-N	CC(=O)N[C@@H]1[C@H](C[C@](O[C@H]1[C@@H]([C@@H](CO)O)O)(C(=O)O)OC[C@@H]2[C@@H]([C@@H]([C@H]([C@@H](O2)O[C@@H]3[C@H](OC([C@@H]([C@H]3O)NC(=O)C)O)CO)O)O)O)O
Compound annotations are putative and were assigned based on accurate mass, CCS, and library-supported MS/MS matching.

## Sheet: Suppl. Dataset S2
Supplementary Dataset S2. Non-polar compounds, including lipids, detected and annotated in CSF extracts of patients with Parkinson’s disease by hybrid ion mobility-QTOF MS analysis.
No.	Compound Name	RT [min]	CCS (Å²)	m/z meas.	M meas.	VIP value	Ion mode	FC value (post/pre)	log2(FC)	p-value	-log10(p-value)
1	4-Aminobiphenyl	9.82	136.8	170.097	169.089	2.0536	Positive	0.11708	-3.0944	8.0517e-11	10.094
2	4,7-Dimethyl-1,3-benzothiazol-2-ylamine	1.03	132	179.064	178.057	2.3472	Positive	0.17094	-2.5484	7.4645e-19	18.127
3	3-Allyl-4-ethoxy-5-methoxybenzaldehyde	9.62	152.2	221.117	220.11	1.1018	Positive	0.71682	-0.48032	0.0042027	2.3765
4	N,N-Dimethyldodecylamine N-oxide	1.39	175	230.248	229.241	0.45335	Positive	1.2052	0.26926	0.25977	0.58542
5	3,5-Di-tert-butyl-2-hydroxybenzaldehyde	18.14	162.3	235.169	234.162	0.2716	Positive	0.86797	-0.20429	0.50186	0.29941
6	Osthole	8.69	160.5	245.118	244.111	0.31009	Positive	1.1495	0.20102	0.44282	0.35377
7	Tourneforin	1.25	159.1	247.132	246.125	1.7524	Positive	0.15707	-2.6705	4.3017e-07	6.3664
8	2,6-Di-tert-butyl-4-nitrophenol	14.48	163.6	252.16	251.152	0.26154	Positive	1.1182	0.16117	0.51792	0.28574
9	14-Methylpentadecanoic acid	16.86	178.8	257.248	256.241	0.93273	Positive	0.81221	-0.30007	0.017071	1.7678
10	N,N-Diisopropyl-4-hydroxytryptamine	0.82	163.7	261.196	260.189	0.52139	Positive	2.0152	1.0109	0.19374	0.71277
11	(5E,9E)-Farnesylacetone	9.92	172.4	263.237	262.23	0.7097	Positive	1.6922	0.75893	0.074075	1.1303
12	cyclandelate	8.62	167.9	277.18	276.173	0.10306	Positive	1.0379	0.05362	0.79936	0.09726
13	Triphenylphosphine oxide	11.12	162.4	279.094	278.086	0.74998	Positive	0.65476	-0.61096	0.058458	1.2332
14	9E,11E-Octadecadienoic acid	1.27	185.3	281.247	280.24	0.49382	Positive	1.2026	0.26618	0.2189	0.65976
15	Oleamide	11.09	189.4	282.28	281.272	0.57186	Positive	0.71963	-0.47468	0.15311	0.815
16	Piperine	1.16	175.5	286.144	285.137	1.0039	Positive	2.1623	1.1125	0.0097903	2.0092
17	Heptadecasphinganine	1.25	190.2	288.29	287.283	0.65526	Positive	1.2945	0.37243	0.10018	0.9992
18	Norquetiapine	0.93	167.5	296.124	295.117	0.010844	Positive	1.0202	0.028854	0.97867	0.0093628
19	Octamethylcyclotetrasiloxane	4.28	165.9	297.083	296.075	1.3167	Positive	4.1065	2.0379	0.00044894	3.3478
20	Aurapten	17.52	183.7	299.163	298.155	0.56362	Positive	0.6804	-0.55555	0.15928	0.79785
21	D-Erythro-Sphinganine	1.4	195.3	302.306	301.299	1.3654	Positive	1.1665	0.22215	0.00024809	3.6054
22	13-Hydroxy-7,14-labdadiene-6-one	4.67	182.9	305.246	304.239	0.1673	Positive	0.96991	-0.044081	0.67967	0.1677
23	.omega.-3 Arachidonic acid	8.6	183.6	305.246	304.239	0.82469	Positive	1.1613	0.21575	0.0365	1.4377
24	2-amino-4-(2-ethoxyphenyl)-6-methyl-7,8-dihydro-5H-1,6-naphthyridine-3-carbonitrile	0.86	171.6	309.173	308.166	0.54853	Positive	0.62083	-0.68774	0.17104	0.7669
25	Albocycline	9.94	176.3	309.206	308.198	0.43867	Positive	1.2176	0.284	0.27577	0.55946
26	3-Cyclopentene-1-octanoic acid, 2-(3-hydroxy-1-penten-1-yl)-5-oxo-	18.18	173.9	309.206	308.199	0.6635	Positive	0.81576	-0.29378	0.09583	1.0185
27	DGTS 4:0; DGTS 2:0-2:0; [M+H]+	0.81	172.5	320.169	319.162	0.32593	Positive	0.72328	-0.46737	0.41969	0.37707
28	Thr Val Thr	0.95	176.6	320.184	319.177	0.31436	Positive	0.7436	-0.4274	0.43652	0.35999
29	5(Z),8(Z),11(Z)-Eicosatrienoic acid methyl ester	8.63	188.7	321.277	320.27	0.46058	Positive	1.1068	0.14638	0.25212	0.5984
30	Arg-Phe	6.69	193.7	322.184	321.177	0.20944	Positive	0.94127	-0.087314	0.60497	0.21826
31	N-3-Oxotetradec-7Z-enoyl-L-homoserine lactone	0.97	178.9	324.217	323.21	0.57982	Positive	0.7286	-0.4568	0.14732	0.83175
32	1-Palmitoylglycerol	3.5	200.2	331.285	330.278	0.21496	Positive	0.92605	-0.11083	0.59547	0.22514
33	Docosanamide	7.08	205.6	340.358	339.351	0.18699	Positive	1.1432	0.19305	0.64433	0.19089
34	2,3-Dihydroxypropyl octadecanoate	4.8	205.1	341.305	358.309	0.19348	Positive	0.90291	-0.14734	0.63285	0.1987
35	N-butyl-3-[1-[6-(cyclopropylamino)pyrimidin-4-yl]piperidin-4-yl]propanamide	0.96	188.4	346.259	345.252	0.42603	Positive	0.77839	-0.36143	0.29005	0.53752
36	4-propan-2-yl-2-[3-(trifluoromethyl)anilino]pyrido[3,4-b]pyrazin-3-one	17.36	180.9	349.126	348.119	0.16371	Positive	1.1254	0.17041	0.68619	0.16356
37	N-3-Oxohexadec-11Z-enoyl-L-homoserine lactone	1.01	188.1	352.247	351.239	0.36117	Positive	1.5231	0.60702	0.37075	0.43092
38	Diheptyl phthalate	9.9	202.9	363.253	362.246	0.44989	Positive	1.2007	0.26383	0.26349	0.57924
39	(+)-Corydaline	1.07	192.7	370.202	369.195	0.3194	Positive	1.7449	0.80311	0.42915	0.36739
40	Donepezil	0.85	203.6	380.223	379.215	0.37458	Positive	1.8627	0.89736	0.35306	0.45216
41	Gln-Leu-Lys	7.28	182.8	388.254	387.247	0.11476	Positive	1.0867	0.11995	0.77712	0.10951
42	Dioctyl phthalate	6.69	211.3	391.285	390.277	0.030901	Positive	1.0232	0.033036	0.93927	0.027209
43	2-{[4-(Dipentylamino)-2-hydroxyphenyl]carbonyl}benzoic acid	2.24	208.5	398.233	397.226	0.40521	Positive	0.63096	-0.66439	0.31462	0.50222
44	Tris(2-butoxyethyl) phosphate	1.69	197.9	399.252	398.244	0.57965	Positive	1.4151	0.50094	0.14744	0.83139
45	Di-N-octyl phthalate	4.46	216.1	413.267	390.277	0.0472	Positive	1.0527	0.074063	0.90735	0.042224
46	1,24-Dihydroxyvitamin D3	18.13	212.4	417.334	416.327	0.21099	Positive	1.0672	0.093851	0.6023	0.22019
47	Octyl decyl phthalate	9.2	222.2	419.316	418.309	0.22745	Positive	0.82583	-0.27608	0.57417	0.24096
48	Di(2-nonyl) phthalate	17.46	221.9	419.316	418.309	0.3769	Positive	1.3249	0.40587	0.35005	0.45587
49	Di(2,6-dimethyl-4-heptyl) phthalate	4.8	222.1	419.316	418.309	0.060329	Positive	0.954	-0.067934	0.88175	0.054657
50	2-Ethylhexyl sebacate	9.57	221.1	427.38	426.373	0.92339	Positive	1.6049	0.68252	0.018301	1.7375
51	7.alpha.-Hydroxy-3-oxo-4-cholestenoic acid	1.68	219.8	431.315	430.308	0.89867	Positive	1.3958	0.48104	0.021922	1.6591
52	(+)-.alpha.-Tocopherol	9.18	219.9	431.387	430.38	0.38106	Positive	1.1344	0.18191	0.3447	0.46256
53	Di(3,7-dimethyl-1-octyl) phthalate	7.32	228.3	469.329	446.34	0.34508	Positive	1.1274	0.17302	0.39265	0.40599
54	LPC 16:0; [M+H]+	2.35	232.7	496.34	495.333	1.0627	Positive	1.4884	0.57379	0.0059591	2.2248
55	Telmisartan	1.18	229.5	515.245	514.237	0.64219	Positive	4.5955	2.2002	0.10739	0.96905
56	Dilauryl thiodipropionate	17.45	249.8	515.413	514.405	0.32127	Positive	1.2378	0.30783	0.42643	0.37015
57	LPC 18:1; [M+H]+	2.44	235.5	522.356	521.349	0.34387	Positive	1.1479	0.19902	0.39433	0.40414
58	LPC 18:0; [M+H]+	3.41	240.2	524.371	523.364	1.0859	Positive	1.6778	0.74659	0.0048563	2.3137
59	LPE 22:6; [M+H]+	17.52	220.9	526.293	525.286	1.3091	Positive	1.7877	0.83807	0.00049069	3.3092
60	Tri-2-ethylhexyl trimellitate	18.03	256.7	547.4	546.393	0.22542	Positive	0.86152	-0.21505	0.57762	0.23836
61	PC 19:1; PC 2:0-17:1; [M+H]+	2.39	240.2	550.351	549.343	1.0988	Positive	1.5428	0.62557	0.0043217	2.3643
62	Cer-NS d36:1; Cer-NS d18:1/18:0; [M+H]+	11.27	264.1	566.551	565.544	0.67614	Positive	1.2155	0.2815	0.089441	1.0485
63	PC 21:4; PC 5:0-16:4; [M+H]+	1.79	237	572.335	571.328	1.171	Positive	1.4912	0.57644	0.0021766	2.6622
64	SM d32:2; SM d19:2/13:0; [M+H]+	6.1	276.3	673.528	672.521	1.1071	Positive	1.4428	0.52885	0.0040063	2.3973
65	SM d32:1; SM d16:0/16:1; [M+H]+	7.05	280.1	675.544	674.536	1.2761	Positive	1.4826	0.56814	0.00071717	3.1444
66	SM d32:0; SM d16:0/16:0; [M+H]+	7.42	283	677.556	676.549	0.86095	Positive	1.4269	0.51284	0.028588	1.5438
67	1-Palmitoyl-2-lauroyl-sn-glycero-3-phosphorylcholine	7.1	274.8	678.507	677.499	1.3537	Positive	7.3988	2.8873	0.00028688	3.5423
68	SM d33:1; SM d15:1/18:0; [M+H]+	7.69	282.7	689.559	688.552	1.3931	Positive	1.5312	0.6147	0.00017413	3.7591
69	PC 30:1e; PC 14:0e/16:1; [M+H]+	9	279.2	690.544	689.536	1.0447	Positive	1.6822	0.75034	0.0069618	2.1573
70	PC 30:0e; PC 18:0e/12:0; [M+H]+	9.31	282	692.558	691.551	0.52699	Positive	1.2208	0.28787	0.18889	0.72379
71	SM d34:2; SM d22:2/12:0; [M+H]+	7.24	281.9	701.559	700.553	1.3865	Positive	1.5324	0.61575	0.00018973	3.7219
72	PE 34:2e; PE 16:2e/18:0; [M+H]+	10.66	275.5	702.546	701.538	1.4565	Positive	1.5984	0.67665	7.3909e-05	4.1313
73	SM d34:1; SM d19:1/15:0; [M+H]+	8.23	286.2	703.577	702.57	1.3795	Positive	1.6374	0.71137	0.00020764	3.6827
74	SM d34:0; SM d21:0/13:0; [M+H]+	8.71	289.6	705.59	704.582	1.5497	Positive	3.1188	1.641	1.829e-05	4.7378
75	1-Myristoyl-2-palmitoyl-sn-glycero-3-phosphocholine	8.57	280.4	706.538	705.531	1.5599	Positive	1.7899	0.83992	1.5516e-05	4.8092
76	SM d35:1; SM d20:1/15:0; [M+H]+	8.96	289.3	717.591	716.583	1.1814	Positive	1.462	0.54798	0.0019613	2.7074
77	PC 32:1e; PC 16:1e/16:0; [M+H]+	10.38	284.7	718.574	717.567	1.4021	Positive	1.8812	0.91169	0.00015492	3.8099
78	PC 31:0; PC 15:0-16:0; [M+H]+	8.97	283.3	720.555	719.548	1.6221	Positive	1.7075	0.7719	5.43e-06	5.2652
79	PC 32:0e; PC 14:0e/18:0; [M+H]+	10.74	288.1	720.59	719.583	2.2498	Positive	9.8442	3.2993	3.6235e-15	14.441
80	PE 36:5e; PE 16:1e/20:4; [M+H]+	9.29	275	724.528	723.523	1.4293	Positive	1.7727	0.82597	0.00010761	3.9681
81	Palmitoyl sphingomyelin	8.21	287.9	725.557	702.569	1.244	Positive	1.5594	0.64096	0.0010218	2.9906
82	PE 36:4e; PE 20:4e/16:0; [M+H]+	9.66	276	726.543	725.536	0.51122	Positive	1.303	0.38182	0.20277	0.69299
83	PC 32:3; PC 13:1-19:2; [M+H]+	8.59	282.9	728.522	727.515	1.4857	Positive	0.46059	-1.1184	4.8599e-05	4.3134
84	SM d36:2; SM d21:2/15:0; [M+H]+	8.4	288	729.591	728.584	0.5162	Positive	0.87108	-0.19912	0.19831	0.70264
85	1,2-Dipalmitoleoyl-sn-glycero-3-phosphocholine	7.59	280	730.539	729.532	1.1407	Positive	1.5875	0.66674	0.0029218	2.5344
86	PE 36:2e; PE 18:1e/18:1; [M+H]+	12.07	282.1	730.576	729.568	1.4812	Positive	1.6169	0.69325	5.1865e-05	4.2851
87	SM d36:1; SM d16:1/20:0; [M+H]+	9.58	292.9	731.607	730.599	1.231	Positive	1.4633	0.5492	0.0011748	2.93
88	1-Oleoyl-2-myristoyl-sn-glycero-3-phosphocholine	8.57	283.4	732.554	731.547	0.65644	Positive	1.2389	0.30907	0.099549	1.002
89	SM d36:0; SM d14:0/22:0; [M+H]+	10.07	295.1	733.617	732.61	1.0806	Positive	1.8051	0.85211	0.0050893	2.2933
90	1-Myristoyl-2-stearoyl-sn-glycero-3-phosphocholine	9.58	286	734.57	733.563	1.7798	Positive	1.9193	0.94055	2.3591e-07	6.6272
91	2-Arachidonoyl-1-palmitoyl-sn-glycero-3-phosphoethanolamine	8.61	277.7	740.523	739.516	1.7806	Positive	2.266	1.1802	2.316e-07	6.6353
92	PC 34:3e; PC 18:1e/16:2; [M+H]+	9.38	284.9	742.575	741.568	1.1468	Positive	1.7034	0.76845	0.002757	2.5596
93	PC 33:2; PC 15:1-18:1; [M+H]+	11.14	288.2	744.551	743.544	0.62346	Positive	0.43811	-1.1906	0.1184	0.92666
94	PC 33:2; PC 17:0-16:2; [M+H]+	9.68	285.9	744.553	743.546	0.64832	Positive	0.55868	-0.8399	0.10396	0.98312
95	1,2-Dioleoyl-sn-glycero-3-phosphoethanolamine	10.19	280.3	744.554	743.547	0.6012	Positive	1.6415	0.71501	0.13256	0.87759
96	PC 34:2e; PC 16:0e/18:2; [M+H]+	9.58	287.6	744.589	743.582	1.5358	Positive	2.6488	1.4053	2.277e-05	4.6426
97	SM d37:1; SM d23:1/14:0; [M+H]+	10.42	295.3	745.622	744.615	0.94268	Positive	1.2825	0.35891	0.015837	1.8003
98	1-Stearoyl-2-oleoyl-sn-glycero-3-phosphoethanolamine	17.27	273.6	746.563	745.555	0.55703	Positive	0.83656	-0.25746	0.16434	0.78426
99	PC 33:1; PC 14:0-19:1; [M+H]+	9.15	286.4	746.57	745.563	1.8411	Positive	3.0009	1.5854	5.5411e-08	7.2564
100	1-Hexadecyl-2-(9Z-octadecenoyl)-sn-glycero-3-phosphocholine	10.81	291.6	746.606	745.598	1.0417	Positive	1.3909	0.47598	0.0071442	2.146
101	PE 38:7e; PE 16:2e/22:5; [M+H]+	8.9	278.1	748.528	747.521	1.4821	Positive	1.697	0.76296	5.1193e-05	4.2908
102	PC 33:0; PC 16:0-17:0; [M+H]+	10.29	290.2	748.585	747.578	1.8625	Positive	3.4754	1.7972	3.2282e-08	7.491
103	PC 34:0e; PC 14:0e/20:0; [M+H]+	12.31	293.8	748.618	747.611	2.0063	Positive	17.772	4.1515	4.4719e-10	9.3495
104	PE 38:6e; PE 16:0e/22:6; [M+H]+	9.4	279	750.543	749.536	1.1596	Positive	1.4689	0.55474	0.0024338	2.6137
105	PE 38:6e; PE 18:3e/20:3; [M+H]+	9.15	280.5	750.543	749.536	1.1241	Positive	1.4372	0.52328	0.0034206	2.4659
106	1-(1Z-Octadecenyl)-2-(5Z,8Z,11Z,14Z-eicosatetraenoyl)-sn-glycero-3-phosphoethanolamine	10.7	282	752.559	751.553	1.379	Positive	1.6528	0.7249	0.00020899	3.6799
107	PE 38:5e; PE 16:1e/22:4; [M+H]+	10.27	281.5	752.559	751.552	1.3456	Positive	1.7096	0.77363	0.00031695	3.499
108	PE 37:4; PE 17:2-20:2; [M+H]+	9.81	283.9	754.537	753.53	0.14271	Positive	0.89364	-0.16223	0.72475	0.13981
109	PC 34:3; PC 14:0-20:3; [M+H]+	9.54	230.3	756.552	755.545	1.7525	Positive	4.4107	2.141	4.2975e-07	6.3668
110	SM d38:2; SM d21:2/17:0; [M+H]+	9.79	294.7	757.622	756.614	0.88909	Positive	1.2955	0.37356	0.023477	1.6294
111	1-Hexadecanoyl-2-octadecadienoyl-sn-glycero-3-phosphocholine	8.84	286.5	758.57	757.563	1.3913	Positive	0.36858	-1.4399	0.00017838	3.7487
112	SM d38:1; SM d25:0/13:1; [M+H]+	11.16	297	759.638	758.632	1.2921	Positive	1.5708	0.65153	0.00059797	3.2233
113	1-Oleoyl-2-palmitoyl-sn-glycero-3-phosphocholine	11.3	289	760.585	759.578	0.5245	Positive	0.45369	-1.1402	0.19104	0.71888
114	2-Oleoyl-1-palmitoyl-sn-glycero-3-phosphocholine	9.68	289.5	760.588	759.579	1.6219	Positive	1.6661	0.7365	5.4525e-06	5.2634
115	PC 34:0; PC 17:0-17:0; [M+H]+	11.27	292.8	762.598	761.591	1.6805	Positive	1.906	0.93052	1.8544e-06	5.7318
116	2-Docosahexaenoyl-1-palmitoyl-sn-glycero-3-phosphoethanolamine	8.26	279.9	764.523	763.515	0.649	Positive	1.1926	0.2541	0.10358	0.98471
117	PE 38:5; PE 20:1-18:4; [M+H]+	8.71	280.2	766.539	765.532	1.754	Positive	2.1402	1.0977	4.1631e-07	6.3806
118	1-O-Hexadecyl-2-O-(5Z,8Z,11Z,14Z,17Z-eicosapentaenoyl)-sn-glyceryl-3-phosphorylcholine	9.18	288.1	766.575	765.568	1.3826	Positive	1.6478	0.72051	0.00019958	3.6999
119	PE 38:4; PE 19:2-19:2; [M+H]+	9.96	283.6	768.554	767.547	1.2497	Positive	1.489	0.57437	0.00096024	3.0176
120	1-Hexadecyl-2-(5Z,8Z,11Z,14Z-eicosatetraenoyl)-sn-glycero-3-phosphocholine	9.47	290.8	768.59	767.583	1.5402	Positive	1.8967	0.92352	2.1238e-05	4.6729
121	1-Hexadecyl-2-(8Z,11Z,14Z-eicosatrienoyl)-sn-glycero-3-phosphocholine	10.89	293.7	770.606	769.599	1.3455	Positive	1.8312	0.8728	0.00031745	3.4983
122	TAG 44:1; TAG 12:1-16:0-16:0; [M+Na]+	17.04	298.6	771.648	748.659	0.48497	Positive	1.3306	0.41213	0.22743	0.64314
123	PC 35:2; PC 15:1-20:1; [M+H]+	9.43	289.7	772.585	771.578	1.1716	Positive	1.5056	0.59037	0.0021623	2.6651
124	1,2-Dioleoyl-sn-glycero-3-phosphoethanolamine-N,N-dimethyl	17.91	290.6	772.587	771.58	0.16534	Positive	1.1115	0.15248	0.68322	0.16544
125	1-(1Z-Octadecenyl)-2-(9Z-octadecenoyl)-sn-glycero-3-phosphocholine	12.33	294.8	772.622	771.614	1.5556	Positive	2.2695	1.1824	1.6635e-05	4.779
126	SM d39:1; SM d19:0/20:1; [M+H]+	12	299.7	773.653	772.646	0.54555	Positive	1.3077	0.38703	0.17343	0.76087
127	PC 35:1; PC 13:0-22:1; [M+H]+	10.66	293.3	774.601	773.593	1.4209	Positive	1.6196	0.69559	0.00012065	3.9185
128	PC 36:1e; PC 18:0e/18:1; [M+H]+	12.28	296.9	774.637	773.629	1.3536	Positive	21.503	4.4265	0.00028752	3.5413
129	1-(1Z-Octadecenyl)-2-(4Z,7Z,10Z,13Z,16Z,19Z-docosahexaenoyl)-sn-glycero-3-phosphoethanolamine	10.26	284.4	776.559	775.552	1.3721	Positive	1.6146	0.69114	0.00022797	3.6421
130	PC 35:0; PC 15:0-20:0; [M+H]+	10.25	297.4	776.618	775.611	1.6906	Positive	13.693	3.7753	1.5248e-06	5.8168
131	PE 40:6e; PE 22:3e/18:3; [M+H]+	10.52	286.7	778.574	777.567	1.3653	Positive	1.5803	0.66016	0.00024829	3.605
132	Palmitoyleicosapentaenoyl phosphatidylcholine	7.68	286.3	780.554	779.546	0.96922	Positive	1.5357	0.61887	0.01291	1.8891
133	1,2-Dilinoleoyl-sn-glycero-3-phosphocholine	8.54	289.9	782.571	781.564	0.029912	Positive	0.99185	-0.01181	0.94121	0.026313
134	PC 36:3; PC 16:0-20:3; [M+H]+	9.1	291	784.585	783.578	1.2361	Positive	1.6643	0.7349	0.0011118	2.954
135	SM d40:2; SM d14:1/26:1; [M+H]+	11.38	300.4	785.653	784.646	0.27514	Positive	1.1014	0.13932	0.49627	0.30428
136	1,2-Dioleoyl-sn-glycero-3-phosphatidylcholine	10.11	293.6	786.601	785.594	1.1437	Positive	1.4662	0.55204	0.0028386	2.5469
137	SM d40:1; SM d18:0/22:1; [M+H]+	12.56	301.4	787.669	786.663	1.2834	Positive	1.6374	0.71142	0.00066028	3.1803
138	PC 36:1; PC 18:0-18:1; [M+H]+	11.41	295.5	788.617	787.61	1.7679	Positive	1.8412	0.88063	3.0718e-07	6.5126
139	PE 40:7; PE 18:3-22:4; [M+H]+	8.39	282.9	790.539	789.531	0.36716	Positive	1.1355	0.18329	0.36278	0.44036
140	2-Docosahexaenoyl-1-stearoyl-sn-glycero-3-phosphoethanolamine	9.56	286.2	792.554	791.547	1.3863	Positive	1.842	0.88125	0.00019016	3.7209
141	1-O-Hexadecyl-2-O-(4Z,7Z,10Z,13Z,16Z,19Z-docosahexaenoyl)-sn-glyceryl-3-phosphorylcholine	9.26	293.1	792.59	791.583	1.1889	Positive	1.5558	0.63764	0.0018189	2.7402
142	1-(1Z-Octadecenyl)-2-(5Z,8Z,11Z,14Z-eicosatetraenoyl)-sn-glycero-3-phosphocholine	9.52	295.3	794.605	793.598	1.1846	Positive	1.6355	0.70973	0.0018995	2.7214
143	PE 40:4; PE 20:2-20:2; [M+H]+	10.91	291.2	796.585	795.578	0.98072	Positive	1.386	0.47097	0.011793	1.9284
144	PC 37:4; PC 13:0-24:4; [M+H]+	9.19	293	796.585	795.578	1.3535	Positive	1.6143	0.69087	0.00028759	3.5412
145	PC 38:4e; PC 18:3e/20:1; [M+H]+	10.85	297.3	796.621	795.614	1.0683	Positive	1.4739	0.55968	0.0056744	2.2461
146	SM d41:3; SM d17:1/24:2; [M+H]+	10.67	300.3	797.653	796.646	0.48354	Positive	1.2406	0.31101	0.22884	0.64048
147	TAG 46:2; TAG 14:0-16:1-16:1; [M+Na]+	17.1	302.5	797.664	774.674	0.49045	Positive	1.2924	0.37001	0.22213	0.6534
148	SM d41:2; SM d18:1/23:1; [M+H]+	12.23	302.2	799.669	798.662	0.89171	Positive	1.5461	0.62863	0.023043	1.6375
149	SM d41:1; SM d20:1/21:0; [M+H]+	13.46	304.6	801.684	800.677	0.82421	Positive	1.4142	0.50003	0.036614	1.4363
150	PC 38:7; PC 16:3-22:4; [M+H]+	7.23	288.6	804.555	803.548	1.865	Positive	3.2357	1.6941	3.0215e-08	7.5198
151	1-Palmitoyl-2-docosahexaenoyl-sn-glycero-3-phosphocholine	8.19	292.1	806.57	805.563	1.5512	Positive	1.743	0.80154	1.7843e-05	4.7485
152	PC 38:5; PC 18:0-20:5; [M+H]+	8.91	293.9	808.584	807.577	2.1425	Positive	36.358	5.1842	1.7671e-12	11.753
153	PC 38:5; PC 18:1-20:4; [M+H]+	8.6	293.8	808.584	807.577	1.5954	Positive	1.9493	0.96293	8.6183e-06	5.0646
154	SM d42:4; SM d16:3/26:1; [M+H]+	10.07	300.5	809.653	808.645	0.90951	Positive	1.4087	0.49439	0.020266	1.6932
155	1-Stearoyl-2-arachidonyl-sn-glycero-3-phosphocholine	9.79	295.9	810.601	809.593	1.4428	Positive	1.6769	0.74581	8.9514e-05	4.0481
156	N-(15Z-Tetracosenoyl)-1-.beta.-galactosylsphing-4-enine	12.49	301.6	810.682	809.675	0.52534	Positive	1.1878	0.24827	0.19031	0.72054
157	SM d42:3; SM d14:2/28:1; [M+H]+	11.19	302.3	811.669	810.66	1.1686	Positive	1.7226	0.78462	0.0022287	2.6519
158	PC 38:3; PC 18:0-20:3; [M+H]+	10.41	297.3	812.616	811.609	1.1854	Positive	1.9187	0.94015	0.0018837	2.725
159	SM d42:2; SM d18:2/24:0; [M+H]+	12.56	304.9	813.685	812.677	1.5932	Positive	2.0929	1.0655	8.9492e-06	5.0482
160	PC 38:2; PC 19:1-19:1; [M+H]+	11.54	299.1	814.632	813.624	1.3886	Positive	1.7708	0.82443	0.00018474	3.7334
161	N-Tetracosanoyl-4-sphingenyl-1-O-phosphorylcholine	14.87	307.6	815.699	814.692	1.6825	Positive	0.14708	-2.7654	1.7834e-06	5.7487
162	SM d42:1; SM d17:1/25:0; [M+H]+	14.13	307.5	815.7	814.694	0.56709	Positive	1.2469	0.31834	0.15666	0.80505
163	PC 39:6; PC 17:1-22:5; [M+H]+	8.72	295.5	820.585	819.577	1.9002	Positive	4.5045	2.1714	1.1759e-08	7.9296
164	PC 39:5; PC 19:1-20:4; [M+H]+	8.11	297.8	822.6	821.593	1.636	Positive	3.5037	1.8089	4.2397e-06	5.3727
165	SM d43:3; SM d15:3/28:0; [M+H]+	12.1	305	825.685	824.677	1.4894	Positive	2.54	1.3448	4.602e-05	4.3371
166	TAG 48:2; TAG 14:0-16:0-18:2; [M+Na]+	17.33	308.5	825.696	802.706	0.42359	Positive	1.2212	0.28831	0.29287	0.53333
167	SM d43:2; SM d23:0/20:2; [M+H]+	13.36	307.7	827.698	826.69	0.77762	Positive	1.3333	0.41496	0.049352	1.3067
168	PC 40:7; PC 18:2-22:5; [M+H]+	8.25	295.9	832.585	831.578	1.9599	Positive	5.0749	2.3434	2.0415e-09	8.69
169	1-Docosahexaenoyl-2-stearoyl-sn-glycero-3-phosphocholine	8.64	297.1	834.6	833.593	1.9933	Positive	7.1822	2.8444	6.9606e-10	9.1574
170	2-Docosahexaenoyl-1-stearoyl-sn-glycero-3-phosphoserine	8.12	291.2	836.543	835.536	0.67784	Positive	1.185	0.24494	0.088607	1.0525
171	PC 40:5; PC 24:1-16:4; [M+H]+	9.82	299.1	836.615	835.608	1.6098	Positive	2.1171	1.0821	6.7346e-06	5.1717
172	PC 40:4; PC 20:2-20:2; [M+H]+	11.09	300.8	838.632	837.625	1.3609	Positive	1.7876	0.83801	0.00026236	3.5811
173	SM d44:3; SM d18:1/26:2; [M+H]+	12.79	308.5	839.698	838.691	1.352	Positive	2.0528	1.0376	0.00029332	3.5327
174	SM d44:2; SM d17:1/27:1; [M+H]+	14	310.3	841.716	840.709	1.9773	Positive	7.813	2.9659	1.1763e-09	8.9295
175	PC 42:5e; PC 16:1e/26:4; [M+H]+	12.29	305.9	850.668	849.661	1.1182	Positive	11.47	3.5198	0.0036152	2.4419
176	TAG 50:3; TAG 14:1-16:1-20:1; [M+Na]+	17.34	311.9	851.71	828.721	0.37176	Positive	1.2832	0.35971	0.35673	0.44766
177	PC 42:7; PC 22:2-20:5; [M+H]+	9.47	302.1	860.617	859.609	1.431	Positive	1.7207	0.78296	0.00010521	3.9779
178	(3'-Sulfo)Gal.beta.-Cer(D18:1/22:0)	11.15	299.3	864.629	863.621	0.55662	Positive	0.38966	-1.3597	0.16466	0.78342
179	TAG 52:5; TAG 12:0-18:2-22:3; [M+Na]+	17.17	314.6	875.711	852.72	0.48115	Positive	1.5513	0.63348	0.23118	0.63605
180	TAG 52:4; TAG 16:1-18:1-18:2; [M+Na]+	17.36	317.3	877.726	854.736	0.55022	Positive	1.4524	0.5384	0.1697	0.77033
181	PC 44:5e; PC 22:5e/22:0; [M+H]+	14.2	311.6	878.699	877.692	1.7494	Positive	4.0652	2.0233	4.5885e-07	6.3383
182	TAG 52:2; TAG 16:0-18:1-18:1; [M+Na]+	17.66	320.5	881.757	858.768	0.51441	Positive	1.3552	0.43847	0.1999	0.69918
183	TAG 54:7; TAG 15:3-18:3-21:1; [M+Na]+	16.95	315.4	899.709	876.72	0.53654	Positive	1.6225	0.6982	0.18082	0.74276
184	TAG 54:6; TAG 18:2-18:2-18:2; [M+Na]+	17.19	317.6	901.727	878.736	0.58045	Positive	1.6385	0.71234	0.14687	0.83308
185	PC 46:7e; PC 22:5e/24:2; [M+H]+	13.43	313.5	902.699	901.691	1.9503	Positive	10.532	3.3967	2.739e-09	8.5624
186	TAG 54:5; TAG 17:0-17:0-20:5; [M+Na]+	17.37	320.4	903.74	880.751	0.55613	Positive	1.493	0.57819	0.16504	0.78241
187	TAG 54:3; TAG 16:0-16:0-22:3; [M+Na]+	17.67	324.4	907.773	884.784	0.46406	Positive	1.398	0.48338	0.24849	0.60468
188	PC 46:7; PC 20:3-26:4; [M+H]+	12.52	312.7	916.676	915.669	0.89934	Positive	0.53953	-0.89022	0.021817	1.6612
RT, retention time; CCS, collision cross section; m/z meas., measured mass-to-charge ratio; M meas., measured neutral mass; VIP, variable importance in projection; FC, fold change (post/pre).	PC 46:7; PC 20:3-26:4; [M+H]+	12.52	312.7	916.676	915.669	0.89934	Positive	0.53953	-0.89022	0.021817	1.6612
Compound annotations are putative and were assigned based on accurate mass, CCS, and library-supported MS/MS matching.
